# Supplementary material for: TGFB1 rs8179181 polymorphism is reproducibly associated with Parkinson’s disease in a Spanish population
Source: bioRxiv or medRxiv preprint supplement (doi:10.1101/2022.07.09.22277447), 2022-07-10
Supplement: Supplementary file [file media-1.pdf]

## Supplementary Material

Supplementary Material S1. Coding and regulatory regions targeted for resequencing. Start/end position in base pairs (bp), according to the NCBI build GRCh37.

| Gene   | Region          | Chro. | Start     | End       | Num. Amplicons | Size (bases) |
|--------|-----------------|-------|-----------|-----------|----------------|--------------|
| TGFB1  | 5'UTR/coding    | chr19 | 41836806  | 41837120  | 2              | 314          |
| TGFB1  | coding/splicing | chr19 | 41838027  | 41838191  | 2              | 164          |
| TGFB1  | coding/splicing | chr19 | 41847782  | 41847940  | 1              | 158          |
| TGFB1  | coding/splicing | chr19 | 41848069  | 41848157  | 1              | 88           |
| TGFB1  | coding/splicing | chr19 | 41850646  | 41850774  | 1              | 128          |
| TGFB1  | coding/splicing | chr19 | 41854194  | 41854365  | 2              | 171          |
| TGFB1  | coding/3'UTR    | chr19 | 41858589  | 41859836  | 4              | 1247         |
| TGFB2  | 5'UTR/coding    | chr1  | 218518670 | 218520394 | 10             | 1724         |
| TGFB2  | coding/splicing | chr1  | 218536670 | 218536764 | 1              | 94           |
| TGFB2  | coding/splicing | chr1  | 218578505 | 218578679 | 2              | 174          |
| TGFB2  | coding/splicing | chr1  | 218607418 | 218607561 | 1              | 143          |
| TGFB2  | coding/splicing | chr1  | 218607674 | 218607795 | 1              | 121          |
| TGFB2  | coding/splicing | chr1  | 218609306 | 218609494 | 1              | 188          |
| TGFB2  | coding/splicing | chr1  | 218610679 | 218610843 | 1              | 164          |
| TGFB2  | coding/3'UTR    | chr1  | 218614540 | 218617966 | 18             | 3426         |
| SMAD3  | 5'UTR/coding    | chr15 | 67358189  | 67358703  | 3              | 514          |
| SMAD3  | 5'UTR           | chr15 | 67418048  | 67418327  | 3              | 279          |
| SMAD3  | 5'UTR/coding    | chr15 | 67430353  | 67430443  | 1              | 90           |
| SMAD3  | coding/splicing | chr15 | 67457227  | 67457431  | 2              | 204          |
| SMAD3  | coding/splicing | chr15 | 67457585  | 67457727  | 2              | 142          |
| SMAD3  | 5'UTR           | chr15 | 67458487  | 67458536  | 1              | 49           |
| SMAD3  | coding/splicing | chr15 | 67459111  | 67459196  | 1              | 85           |
| SMAD3  | coding/splicing | chr15 | 67462886  | 67462947  | 1              | 61           |
| SMAD3  | coding/splicing | chr15 | 67473573  | 67473796  | 2              | 223          |
| SMAD3  | coding/splicing | chr15 | 67477059  | 67477207  | 1              | 148          |
| SMAD3  | coding/splicing | chr15 | 67479697  | 67479852  | 1              | 155          |
| SMAD3  | coding/3'UTR    | chr15 | 67482745  | 67487538  | 25             | 4793         |
| SMAD2  | 5'UTR/coding    | chr18 | 45359460  | 45368326  | 46             | 8866         |
| SMAD2  | coding/splicing | chr18 | 45371705  | 45371860  | 2              | 155          |
| SMAD2  | coding/splicing | chr18 | 45372028  | 45372176  | 1              | 148          |
| SMAD2  | coding/splicing | chr18 | 45374840  | 45375063  | 2              | 223          |
| SMAD2  | coding/splicing | chr18 | 45377639  | 45377703  | 1              | 64           |
| SMAD2  | coding/splicing | chr18 | 45391424  | 45391509  | 1              | 85           |
| SMAD2  | coding/splicing | chr18 | 45394688  | 45394833  | 1              | 145          |
| SMAD2  | coding/splicing | chr18 | 45395608  | 45395812  | 2              | 204          |
| SMAD2  | coding/splicing | chr18 | 45396840  | 45396940  | 1              | 100          |
| SMAD2  | coding/3'UTR    | chr18 | 45422886  | 45423185  | 2              | 299          |
| SMAD2  | 3'UTR           | chr18 | 45456726  | 45456931  | 1              | 205          |
| SMAD2  | 3'UTR           | chr18 | 45457165  | 45457517  | 1              | 352          |
| SMAD2  | 3'UTR           | chr18 | 45457165  | 45457520  | 1              | 355          |
| TGFBR1 | 5'UTR/coding    | chr9  | 101867406 | 101867589 | 0              | 183          |
| TGFBR1 | coding/splicing | chr9  | 101891131 | 101891387 | 2              | 256          |
| TGFBR1 | coding/splicing | chr9  | 101894785 | 101895026 | 2              | 241          |
| TGFBR1 | coding/splicing | chr9  | 101900135 | 101900376 | 2              | 241          |
| TGFBR1 | coding/splicing | chr9  | 101904812 | 101904990 | 1              | 178          |
| TGFBR1 | coding/splicing | chr9  | 101907008 | 101907175 | 2              | 167          |
| TGFBR1 | coding/splicing | chr9  | 101908761 | 101908896 | 1              | 135          |
| TGFBR1 | coding/splicing | chr9  | 101909930 | 101910071 | 1              | 141          |
| TGFBR1 | coding/3'UTR    | chr9  | 101911456 | 101916478 | 28             | 5022         |
| TGFBR2 | 5'UTR/coding    | chr3  | 30647988  | 30648474  | 3              | 486          |
| TGFBR2 | coding/splicing | chr3  | 30664685  | 30664770  | 1              | 85           |
| TGFBR2 | coding/splicing | chr3  | 30686233  | 30686412  | 2              | 179          |
| TGFBR2 | coding/splicing | chr3  | 30691756  | 30691957  | 1              | 201          |
| TGFBR2 | coding/splicing | chr3  | 30713124  | 30713934  | 5              | 810          |
| TGFBR2 | coding/splicing | chr3  | 30715591  | 30715743  | 1              | 152          |
| TGFBR2 | coding/splicing | chr3  | 30729870  | 30730008  | 1              | 138          |
| TGFBR2 | coding/3'UTR    | chr3  | 30732906  | 30735638  | 15             | 2732         |

**Supplementary material S2. Description of the AmpliSeq™ primer system.** <sup>1</sup>Chromosome positions according to the NCBI build GRCh37.

| Gene  | Primer sequence (5'→3')          |                                 | Amplicon position <sup>1</sup> | Pool |
|-------|----------------------------------|---------------------------------|--------------------------------|------|
|       | Forward                          | Reverse                         |                                |      |
| TGFB1 | GCTGAGGTCTCAGGGAGAAAG            | CGCGCATCCTAGACCCTTT             | chr19:41859069-41859257        | 2    |
| TGFB1 | GTGAGCAACAGTAGCCACA              | CCGTGGGATACCTGAGACACC           | chr19:41858884-41859142        | 1    |
| TGFB1 | CTTCACCAAGTCCATGTCGAT            | CGAGGCCCTCTACCTTTTG             | chr19:41858823-41859062        | 2    |
| TGFB1 | ACCGTTGTGGTTTCCACC               | GGACTATCCACCTGCCAAGACT          | chr19:41858592-41858865        | 1    |
| TGFB1 | TTCTCGAGCTCTGATGTGTG             | GTCAGCTCCAAAACCTCTAGAGTTG       | chr19:41854289-41854449        | 2    |
| TGFB1 | GGACCATCTAGTGGACCTTGT            | GCAGAGTACACACAGCATAATATGTTCTT   | chr19:41854091-41854341        | 1    |
| TGFB1 | CCAGGTCTCAGCACTTTCACAC           | GTCTCTCTCTGCCTTCATCATC          | chr19:41850528-41850798        | 2    |
| TGFB1 | TACACACACACTCTCAGAGGGATAG        | GGTTTGTCTCTCTCTCTCTCTC          | chr19:41847969-41848233        | 1    |
| TGFB1 | GAGCACCTGGTCAAGCAT               | ATCCCTCGAGAGTGTGTGTGTA          | chr19:41847717-41847992        | 2    |
| TGFB1 | TTGCGGAAGTCAATGTACAGCT           | CAAGGGAGACCCAGATGGAGATA         | chr19:41838135-41838316        | 1    |
| TGFB1 | GCCAACTCACCTCTCTGACTTTA          | CTGCACTCCAGGAGAGAAGAAC          | chr19:41837934-41838192        | 2    |
| TGFB1 | CGCCCAATGACACAGAGATC             | CTGCCCATCTGTACTACGT             | chr19:41836793-41837040        | 1    |
| TGFB1 | GGAACGTCAAGGATGGAGAC             | GCTGTCCAACATGATCGTGC            | chr19:41836763-41836996        | 2    |
| TGFB1 | GGCATACTAGTGGCACTGTCAG           | TGAAGAAGCAATAAAGATAGTAGTTCAAGGC | chr19:41836200-41836468        | 1    |
| TGFB1 | GAGAAAGAGGAAAGCAGGAGAGAAATTC     | AAAAAGAACTTGCACTCAAGGAAAGA      | chr19:41834975-41835218        | 2    |
| TGFB1 | CTCATGCCACAGGCAAAAGGAAC          | CATCTGCTATGGTCTCTGT             | chr19:41834864-41835023        | 1    |
| TGFB1 | CTCTAATCTATCCATTTGTGGCATGT       | GGAGGAAAGGACAGTATGAGTGTCT       | chr19:41834686-41834913        | 2    |
| TGFB1 | GTACACGACCACTCTCATA              | AGGCAAGGATTCATCTAGCAAG          | chr19:41834591-41834737        | 1    |
| TGFB1 | TTACGTGATGGGCTGACACTT            | ACACAGTACTCGGCTGTAATC           | chr19:41834398-41834645        | 2    |
| TGFB1 | TGTTGAGGGAATCAATTCCTGTC          | AGCCCAATATACACAGATACAAATAGAGA   | chr19:41834198-41834450        | 1    |
| TGFB1 | GGAGGGTGTGGATGTGAGA              | AGCCATCACGGCATCAGA              | chr19:41834029-41834244        | 2    |
| TGFB1 | GACCAACCCGGAATGTG                | GGTCCGTCTTACCACTCAG             | chr19:41833818-41834069        | 1    |
| TGFB1 | ACGGAGCTAACACGTGCTG              | GGGAGATGGTGGGTGAGAGAA           | chr19:41833137-41833363        | 2    |
| TGFB1 | AATGCAAAATTTCACTCAGAAGAACA       | GCTGTTTGGTATGGATGGTCTTGT        | chr19:41832940-41833193        | 1    |
| TGFB2 | CAGACAGTGGTTACAGAGAGAA           | TTTGTCTCTGATGACTCCCTAGA         | chr1:218518624-218518872       | 1    |
| TGFB2 | GGGATGGAGAAATTAAGCCTGACG         | CCCAACGTTGGAAATGCTCG            | chr1:218518823-218518969       | 2    |
| TGFB2 | GCAAGTGCCATCCTACCCCTAAG          | CTCTCTCTCTCTGCTCCAAAC           | chr1:218518928-218519153       | 1    |
| TGFB2 | AAGGGCTGCCGTTGTGAT               | GCTGACCCGCTTGGTTACT             | chr1:218519060-218519232       | 2    |
| TGFB2 | CACACACGTGTGCGCTTC               | GCGGATCTGAACTCGGCT              | chr1:218519428-218519661       | 1    |
| TGFB2 | GACCTTTTCATCTCTCCCTTTTGG         | CCTGACTTTGGCGAGTAAGAAGAAA       | chr1:218519611-218519797       | 2    |
| TGFB2 | CCCATCTCATGCTCCAGAAATTT          | GCGAAAATTTTGCAAACTCTAGTCA       | chr1:218519747-218519923       | 1    |
| TGFB2 | AGGATACGTTTCTCTGTTGGGCAAT        | TGCGCATGAATGCTGCTCATATC         | chr1:218519872-218520146       | 2    |
| TGFB2 | TGTCTACTGCAGCACTC                | GCAAGTCCCTGTGTCTGT              | chr1:218520104-218520275       | 1    |
| TGFB2 | CCCGGAGGTGATTTCCATCTAC           | CGGGCAGAGCTAAACCTCAG            | chr1:45395677-218520436        | 2    |
| TGFB2 | GATAAGAACATTCAAATGATCCCTCTCT     | CCCAAGGAGACAAACTAAAGATG         | chr1:218536567-218536836       | 1    |
| TGFB2 | TAATGGTATTAAGTGGCCGTTGGAA        | GAGACGTCAAACTGAACTTCTGAAAG      | chr1:218578372-218578568       | 2    |
| TGFB2 | CGCCCACTTTCTACAGACCTTA           | GAGAGAGAGAGTCTGTCTAAAACAACAAC   | chr1:218578519-218578737       | 1    |
| TGFB2 | TCATGCTGTCAGAAATGCAACT           | TGTGCTATACTTAAATCTGCAATCAAT     | chr1:218607369-218607644       | 2    |
| TGFB2 | TGATTGCAATTAAGGGTATAGACACAC      | CCAGTCTTGTGCACTGCAACT           | chr1:218607616-218607887       | 1    |
| TGFB2 | GGTGAAGCTAAATGTTTATACCCAAATGC    | GCAGTTTAAGATTAACAGATGCAATTACT   | chr1:218609270-218609543       | 2    |
| TGFB2 | GTGAGGGTGGTGAATCAGCTTT           | TATCAGCAGGTGCACATGTTAAC         | chr1:218610626-218610897       | 1    |
| TGFB2 | AAAAACGAAATGCGTTCAATTTCCG        | CATTGTCAATTTGGTCTTGCACCTTT      | chr1:218614480-218614740       | 2    |
| TGFB2 | TTGCAAAATGCAGCTAAAATCTTGG        | TTTGCTTCTGTCTCTCACTTACAAA       | chr1:218614688-218614963       | 1    |
| TGFB2 | TTGAAAGCCTTATCTCATTTCACTAC       | AAGGGTGCCTATGTCATAGCAAT         | chr1:218614906-218615141       | 2    |
| TGFB2 | GCGCCTCATTTGATTTTCTGT            | CAGACTTCTCGTTCATAAATAACTCACT    | chr1:218615096-218615369       | 1    |
| TGFB2 | GAGGTGATTAATGGGATGAAAACCCA       | ACCAGTACATGTCAAAACATTTCAACATTT  | chr1:218615311-218615577       | 2    |
| TGFB2 | GGTCTTTGTCAGTTTAGTAAACCAAGT      | AAAGAGATCTGCAAGTGTGTTTCAATT     | chr1:218615519-218615719       | 1    |
| TGFB2 | ATTATTAATAAGATGATATAGAAAGCCAGCAT | TACTGGCCAGCTAAAAGAAACATACATT    | chr1:218615658-218615883       | 2    |
| TGFB2 | TGGGCTCTTTAATGATCACTCACA         | CGAACCCATCTTTCTGTGAAACAAAAA     | chr1:218615829-218616045       | 1    |
| TGFB2 | CCTGGTCCACTTGTCTTTCTTT           | AAACCAAGGTAGAGAACTTTTCTTAACTC   | chr1:218615993-218616241       | 2    |
| TGFB2 | GCAAGGATTAAGGGTCTAACTAAAACCTCA   | ATGACTTATGCTGACCTGACTTTT        | chr1:218616170-218616403       | 1    |
| TGFB2 | CAGCATAAGTCAATTTGTGATTTCACTGA    | CTAAATAAGCGCAAGTGATAAACTGACAT   | chr1:218616390-218616639       | 2    |
| TGFB2 | TGCAGAAGAGSTACTCTCATGCT          | TATTATGGCATCCATCTCTGTCTTT       | chr1:218616572-218616834       | 1    |
| TGFB2 | GAAATGGATTGCAAGTTGAAACTGG        | CAGTGCATTCATGAGGAAAGACAAAATAAT  | chr1:218616779-218617010       | 2    |
| TGFB2 | CCTCTCAGATAGGATGACATTTTGTTTTGT   | CGATCAAAATGTACTGCTGATTAACACAAA  | chr1:218616950-218617209       | 1    |
| TGFB2 | GTATGCAAGTGGGACCAATTAAT          | ATGACTTTTCCAGCTTGAGATAGTCTTAT   | chr1:218617155-218617425       | 2    |
| TGFB2 | GATGCTAGAAAACCTGTGATGCA          | GGTGCAAAACATCTCTGCAATTTT        | chr1:218617371-218617645       | 1    |
| TGFB2 | GAGATTAAGTTCCATCCAGCTTGACT       | AGTGGTACCAAGTAAACTGACAG         | chr1:218617583-218617831       | 2    |

|        |                                  |                                  |                          |   |
|--------|----------------------------------|----------------------------------|--------------------------|---|
| TGF B2 | GAGATTTAGTTTCCATCCAGCTTGACT      | AGTGGTACCAGTGAAACTGACAG          | chr1:218617583-218617831 | 2 |
| TGF B2 | TGGTTGTTGGGATCAGCTACTTG          | TAGTTCTTCACTAGACAAAAGCAAGACAA    | chr1:218617783-218617995 | 1 |
| SMA D3 | CCCAATGTGCCAATTGGTTGT            | GAGCCTCAAGGACATCTGTTGA           | chr15:67356951-67357216  | 1 |
| SMA D3 | CCCTCCATTCATTCCITCAAGAAC         | CCCTGGGCTGTTTATTCTCTAG           | chr15:67357170-67357405  | 2 |
| SMA D3 | CCGGTGTGATCTCACCGA               | GGGTTGGACTCGCAGCAA               | chr15:67357363-67357569  | 1 |
| SMA D3 | GCGGTGACAGCACTTGGAAA             | GCTAGCTTTGATGCGCAGAT             | chr15:67357896-67358089  | 2 |
| SMA D3 | CTGCACGCGGATTTGCAT               | GCAGACTCCAAGTGGCAG               | chr15:67357921-67358196  | 1 |
| SMA D3 | CGTGCAGAAACCCAAACTT              | CGCCCAAACCTCGCCTCA               | chr15:67358155-67358390  | 2 |
| SMA D3 | GGCAACTTCGCCGAGAGT               | CGTTCTGCTCGCCCTTCTT              | chr15:67358354-67358565  | 1 |
| SMA D3 | CGTCCATCCTGCCTTCACTC             | GGGATGGTGATGCACCTGGT             | chr15:67358496-67358695  | 2 |
| SMA D3 | TTTTAAGACAACTGACTCCTCTGAGT       | CCACATGTTGCTCTATGGTCAGT          | chr15:67418001-67418171  | 1 |
| SMA D3 | GGGAGCAAACCGCCTGAAATAT           | GGTTCCATGCAATTTGCCAT             | chr15:67418037-67418288  | 2 |
| SMA D3 | GTTCACACAGGATGCGACAT             | GTTCCTGCTTCTCAGTGACAAATACC       | chr15:67418237-67418387  | 1 |
| SMA D3 | GAAAATAGGAGGTAAGAAATTCGGACTTC    | CGGAGAAAACCTGACAGATCTCTG         | chr15:67430262-67430537  | 2 |
| SMA D3 | CTCTGCAAGAAAGCAAGCAAACTC         | GCATACCTGGTGTCTACTCTCTG          | chr15:67457170-67457432  | 1 |
| SMA D3 | CTGCGTGAATCCCTACCCTACTC          | ATGCCAGCAAGCAACCAAGTC            | chr15:67457385-67457552  | 2 |
| SMA D3 | GGACAGTTTAACTCCTCTGTGTTG         | CGTGCCCTACCTGGAATATTGCTC         | chr15:67457584-67457731  | 1 |
| SMA D3 | GGACGACTACAGCCATTCATC            | CAACAGGATGCGGTTCTGA              | chr15:67457648-67457887  | 2 |
| SMA D3 | GCTGCGTCTCTTATGAGCATT            | AGTTCAATGACGGCAAGACAGT           | chr15:67458365-67458638  | 1 |
| SMA D3 | GTGTGATGTC TTTGCAAAAGGTGT        | CAAACTACTGGAGAGAGATAGAAAGGGA     | chr15:67459037-67459311  | 2 |
| SMA D3 | GCTCTCCAGGCCAAGAACTCTT           | TCACCGTAAACAGAAACCTGATG          | chr15:67462837-67463091  | 1 |
| SMA D3 | GGAAATGGTTTTCAGAGTGTCAT          | TGAGCCATCCACAGTCATGGAT           | chr15:67473485-67473700  | 2 |
| SMA D3 | ATCTCCTACTACGAGCTGAACCA          | CCTTCAGAGGCTGTGTGTTTCA           | chr15:67473622-67473883  | 1 |
| SMA D3 | ACCCTGTCCAGTCTAACCTGAA           | GCAGAAAAGGTGAGAAAAGTGGGA         | chr15:67477033-67477296  | 2 |
| SMA D3 | GGGTCCAGGACTTGCTTATCC            | CTGATGTAGGACACCATAA              | chr15:67479617-67479874  | 1 |
| SMA D3 | CCCTTTCCCTATTTCTTACAGGAGA        | CAACAATGGGTTGAGTAGAGTTCCA        | chr15:67482729-67482964  | 2 |
| SMA D3 | CCATGCAAGGAGGTGGAGAAAAT          | GCCGGTGGTGAATACTACCTG            | chr15:67482917-67483167  | 1 |
| SMA D3 | CTGGTGGCTTAAAGTGAAGCAA           | GCTGGGAATGTTCACTGGAAAG           | chr15:67483123-67483369  | 2 |
| SMA D3 | CTCTCTGACGCTTGTGACAGT            | CCTCCCAATCAGTATGTTCTGAGAG        | chr15:67483323-67483497  | 1 |
| SMA D3 | TGTGAGCTGGATAGACTTGGGAT          | CAGATCCTTCCAACTTTCAAAGTGAAAA     | chr15:67483416-67483610  | 2 |
| SMA D3 | CCTCTTAAAAAAGCTCACTTACGTTTGTCT   | CAACTGACTACATAAACCAATATAGCCGTA   | chr15:67483551-67483825  | 1 |
| SMA D3 | GCTTGTCCAGATTCTGATGCA            | CCCTTCGGTGAATTTGCTTCTGTA         | chr15:67483773-67484048  | 2 |
| SMA D3 | GACCACTTCTGCAAGCTGAAAT           | GACTAGTTTCTCCCTAATGCTGCT         | chr15:67484000-67484259  | 1 |
| SMA D3 | GCAAGTTGATTTGTGTAACAAAGTACTGCT   | CCTTCCCTTCACTGGAAATAAAGC         | chr15:67484202-67484476  | 2 |
| SMA D3 | TCAAGGGATTTCTATGGAAGTCTCT        | CCCTCCTTCGAGAAAGACTCACA          | chr15:67484427-67484702  | 1 |
| SMA D3 | AAGGAGCACCTTGACAGACTTG           | GCCTAGCAGAAGCCAAAATGGA           | chr15:67484658-67484910  | 2 |
| SMA D3 | CTCTGAGACCCAGGAACCAAAATAT        | GTAAGACACGACTTCCATAGATCACTG      | chr15:67484863-67485087  | 1 |
| SMA D3 | GCACAGCTGATTTCTGGTATC            | GCCTTCAGGCTGAGCAATGAG            | chr15:67485038-67485212  | 2 |
| SMA D3 | GCAATTTGGATGGTCTTAGAAC           | GTTCATACGCCCAAGGCACCTA           | chr15:67485166-67485430  | 1 |
| SMA D3 | CATTCCCACCTTAGAGTGCTACA          | GTGACTAGGTGAAACGCCACTTA          | chr15:67485384-67485615  | 2 |
| SMA D3 | GCTGGTGAAGTGGATAGCAGTTT          | CGTATGTGCTGGAAAGCATCTAAGTTA      | chr15:67485570-67485827  | 1 |
| SMA D3 | CCACCTGCTTCTTCCAAATTTAG          | CACAGACAACATAAGGACAAATGGAGA      | chr15:67485777-67486027  | 2 |
| SMA D3 | GACTCTTAGGAAGAGCACACATGAG        | TGCCATGCACACACTACTTCAA           | chr15:67485956-67486230  | 1 |
| SMA D3 | AAAGCTTTACTCAAGACTACAGAAAAGGT    | TAGAAAACAGGGTCCAGGGCTAA          | chr15:67486179-67486452  | 2 |
| SMA D3 | ATACCAAGCAAGAGAGAGTGCA           | CCTCTTGCCTACGTTTCTCTG            | chr15:67486402-67486677  | 1 |
| SMA D3 | GCTTCTCAAGTGGGTAGGGAAA           | CATTGCAGAACTCACTGAGAAATTTCTCA    | chr15:67486633-67486833  | 2 |
| SMA D3 | AGAAAAGTGCCTCATGTAAGTGGAT        | GTTCCTGGATGCTGAGCCAAAAG          | chr15:67486780-67487055  | 1 |
| SMA D3 | GAATGTTGGTGGAGGGTGTAGT           | ACACACATCAGAGTCCAGAACAG          | chr15:67487007-67487267  | 2 |
| SMA D3 | CAAGAAAGCTTCACTCACTTCA           | TGAGAGGACACAAATCTTTAACAAATAGGG   | chr15:67487201-67487456  | 1 |
| SMA D3 | CAGAGCACTGTTTAAAGCATTTGATC       | GGCTCCCTTTAAATCTTCTCTCCA         | chr15:67487402-67487578  | 2 |
| SMA D2 | GCGGGATGGAAGACGGAG               | GCCTCCCTCGTGTGATTGG              | chr18:45457370-45457555  | 1 |
| SMA D2 | GGACGCACGCAAACTTTC               | CCGGGAGTGTTTTCAAGTCC             | chr18:45456678-45456872  | 2 |
| SMA D2 | CTCATCTAACTGCTCTGTTTCTTTAGC      | TCAAGGTAGTCTCATCATCCTTTCAAT      | chr18:45422947-45423221  | 1 |
| SMA D2 | TTCAAGTAACTTCCCTCAGATTCCTTGA     | AGCAGTGAAAAGTCTGGTGAAGAA         | chr18:45422826-45422999  | 2 |
| SMA D2 | CCCTCCCAAGATCTCTAAGATTC          | CCATGCTTCATGTTCACTCAATTTTT       | chr18:45396799-45396984  | 1 |
| SMA D2 | AGCATAATGCGAGTTTCAATGCC          | TTTTAAAGTTCCTCTCTTCTTTCCC        | chr18:45395677-45395850  | 2 |
| SMA D2 | TTACACTAAAATTTCC TGGGT CACAAGA   | CTGATCTT CACAGT CACTCATGAACCTCAA | chr18:45395517-45395730  | 1 |
| SMA D2 | CCAAGTTTTAGGAGATT CAGAAAGGCA     | CTTTGCATTAACTTGGATTTCTTGA        | chr18:45394660-45394864  | 2 |
| SMA D2 | ATGCGTCTCAACTTCTCTAAATTTAAGAGT   | GGAGTGATTCATTTGTTATCTCTGGT       | chr18:45391321-45391594  | 1 |
| SMA D2 | ATTATTTGGCTATTCATTAGGATCCCTTTCTC | AACCAGATAAAGCTAGTTTATGATTA       | chr18:45377520-45377779  | 2 |



|        |                                   |                                           |                          |   |
|--------|-----------------------------------|-------------------------------------------|--------------------------|---|
| SMAD2  | TCTTGTCATTTCTACCGTGGCATT          | TGAAATGTTTACGCAATTTCTTCTTTTATT            | chr18:45374855-45375113  | 1 |
| SMAD2  | GAAAGCTGGTTTTACTGCACACA           | CTTAGGTTTACTCTCCAATGTTAACCGA              | chr18:45374739-45374907  | 2 |
| SMAD2  | TAGCAACAAAGAAAACCTAAGCAAGTTGAC    | CTTCCAAAGT CACA CTGAAA TAGTAAATGT         | chr18:45371971-45372234  | 1 |
| SMAD2  | CCCACCTTTTCACAAAA CTCA TT         | CATGCTCATATTTCTAAAACCTGTAAACCCTT          | chr18:45371723-45371947  | 2 |
| SMAD2  | GCTCAGTAATTTGCAACAGT TTTGAATT     | T CAGCTAACTAGAATGTGCCACCATAAG             | chr18:45371535-45371773  | 1 |
| SMAD2  | ACCA CACACAATGCTATGACAGA          | GCCTGTGGACTTGAATTTCAATCATT TT             | chr18:45368128-45368370  | 2 |
| SMAD2  | ACTCAGTTTTATGCCAATAAGACATCAAT     | TCCCATGAAAAGACTTAA TGTAACAACTCT           | chr18:45367930-45368181  | 1 |
| SMAD2  | TAACAGAGAAGTGGGAA TAACAGATTAGGT   | CTCTCCATTAAAAGAGGAAGAGAAGATTTT            | chr18:45367738-45367998  | 2 |
| SMAD2  | ACCA CAAAAGAAATGACTGTTTAAGCC      | TCTAGGCAAACTTTATAAAGTTGCAGT               | chr18:45367543-45367796  | 1 |
| SMAD2  | ACAAAGGGACTTCTCCATATGAATCTT       | GAAATCCTTGACCTTAA TGTTCA GTG              | chr18:45367326-45367599  | 2 |
| SMAD2  | CCTGAAAATAA TTA TACTGCCACCTA TGCA | GCA C CAGTTAA TCTGGGATACAGT               | chr18:45367216-45367380  | 1 |
| SMAD2  | CATCACTTTCTAGSTA TTTTGCA GAAACA   | GTCTGTTGATTTATCCTTCCACCTCA TAAA           | chr18:45367011-45367279  | 2 |
| SMAD2  | CATGAAATATTGTCAATCAAAAACCAAGGA    | GCA TTA TGAATG GGCCTTTTGTAAA TGTA         | chr18:45366799-45367073  | 1 |
| SMAD2  | GAA CAA GTACCAAAGACAGCTT CAAAAAT  | GCA GTCTGAGCTGTCTTAACTGA                  | chr18:45366605-45366853  | 2 |
| SMAD2  | TGTTCA CCTTTA CCAAAGACTAAGAA      | ACTCCTGGTCTCTTTTCA TAAATTTTCAT            | chr18:45366390-45366664  | 1 |
| SMAD2  | CTCCTCACTTGGCTT GCTCTTTA          | TTCACTGTTGTACCA GGA ACTT                  | chr18:45366190-45366441  | 2 |
| SMAD2  | CAAAAGTTGAGGAAGGAGATATGTTAGT      | ATGCA TGAGCTAACACCTGACAT                  | chr18:45365962-45366237  | 1 |
| SMAD2  | CTGAGTATCTCCTACAGGCTGAT           | TGTGATAGTCTGCTCATGTGATTTCTC               | chr18:45365764-45366017  | 2 |
| SMAD2  | GTCCCAATTTCACTGTACAGAAAATCG       | GCA GAGTAAA TGCTCCTA GGTAA TACCCT         | chr18:45365543-45365817  | 1 |
| SMAD2  | AAACATCATCTCGTTAAAAGCATCAAACA     | AGCGCATCTCTACAGTTCTGATG                   | chr18:45365432-45365596  | 2 |
| SMAD2  | TAGAAAGCATGGCCATTCGGTT            | TTCTGTGTTGTAATTA CATTGTGTGAAATG           | chr18:45365218-45365492  | 1 |
| SMAD2  | CACTAAGTCACTGAGAACTCCAA CAG       | ACAATACTGTTAATTTCTAGGAATGATGACCT          | chr18:45365118-45365276  | 2 |
| SMAD2  | GGATAAAAAGAGCA CAATCAGCGGTA       | AGTAGGTTCCA CAGAGACACCTT                  | chr18:45364950-45365187  | 1 |
| SMAD2  | CAAA GTGACAGGCTCTGAGGAAA          | TGSA TTTAGGCCTA CTTCTGGAA                 | chr18:45364726-45365000  | 2 |
| SMAD2  | AAAAGGGAAAGCA TTTGACAGTGT         | CTTGGTCTGTAGAGGTTGTGTTTTT                 | chr18:45364571-45364775  | 1 |
| SMAD2  | AAGAGGTA GAGAAA CCACTGGGTATAT     | TTGAGTTTGTCTGAT TGTCTGTCTTTT              | chr18:45364417-45364626  | 2 |
| SMAD2  | ATGTACAGTGAAGATTGCTTGTGTACTT      | CAGTCTTAGTCTCTGCTAGTTGAAATCAA             | chr18:45364261-45364487  | 1 |
| SMAD2  | TAAGTATCAATGCCTCGATCAGAGTAAGA     | GTGGCGTAGGTTTATGTTGGGATATA                | chr18:45364099-45364317  | 2 |
| SMAD2  | AAAAACAAGGCTAACAAAGAAAGAGGATA     | GTCTGTGGACATGAACAA TGAATACTTTTT           | chr18:45363952-45364159  | 1 |
| SMAD2  | CCCAAGATGSA AATCTGGTATCG          | TCTGCATATATCA GAA TTTCTCTCTCTTG           | chr18:45363376-45363637  | 2 |
| SMAD2  | GCTCATATTTCTGGTTGTAAGGCT          | AGTTGCA GCAATGTTTTCCCTA                   | chr18:45363158-45363422  | 1 |
| SMAD2  | CCCACTGTAAAGTTTGTCTATGAGTGAT      | CTTGGAGTGGAAATCTCTGTGTTTTG                | chr18:45362951-45363208  | 2 |
| SMAD2  | TTAAATGAAGTCCAAATGGCAGATTAAG      | ACTGCCTCAGTCTTTT AAGAAAGGAAATAA           | chr18:45362802-45363042  | 1 |
| SMAD2  | GAGGGAGCAATCTAGTATTCAACAACA       | TGGA CAGACCATTGGAGTACA TTAATTTT           | chr18:45362631-45362860  | 2 |
| SMAD2  | CAAA CCAA CTGGCACTGAAGTT          | GGGATGACTAACTTAGGGTTA ACTTGT              | chr18:45362420-45362689  | 1 |
| SMAD2  | GAGCATATTTGGAGAACTAAGAGCTGTTA     | AGGTGATCTCGCTGGAGTATATTA ACTT             | chr18:45362213-45362470  | 2 |
| SMAD2  | ATGGCAAGTTACCTAGTGA TTAACATTGT    | AGAAAA GATTTCTTTA C C C T C C A A C A G T | chr18:45362009-45362273  | 1 |
| SMAD2  | TTTTCTAGCTCGAACAATCCAAGATT        | CTTTCTGTGGCTTTAAAGTTTTGACTA               | chr18:45361811-45362072  | 2 |
| SMAD2  | GGTTCTATTTTGTCAAA CAGTTGGGTTT     | CATTTGT TFGCCACTCTACTATTCCC               | chr18:45361610-45361864  | 1 |
| SMAD2  | GCCTACAATGCTGTGATCTAGTTCA         | CAAGTAGGTAACA TG CATGAGTTTTGAATT          | chr18:45361402-45361677  | 2 |
| SMAD2  | AAAAATTTCTAGCCAACTGTTTTCCACAG     | AA GATGAGAACAGTTCTGCA GTTGT               | chr18:45361214-45361452  | 1 |
| SMAD2  | AGTAATCAAGCA AATTA GTGAGCAGTGAT   | GCA GCCTTGT TTTAATA TAA TGCA GGA          | chr18:45361046-45361274  | 2 |
| SMAD2  | AGAACACTACCCACTCGTTCTTAATA        | CTGAAAACA GATTTCAA GAGTGA GCTTTT          | chr18:45360858-45361105  | 1 |
| SMAD2  | TGATGTGCTACTTACAGAAAA TCCACAT     | CCTGAAAAGTTCTTACCTTTTCTCTAGTGA            | chr18:45360732-45360915  | 2 |
| SMAD2  | GCTGAGTTTGAAGCAACTATGACAAACA      | CCCTGGATACA AAACTTTAGCA GAGTTT            | chr18:45360524-45360798  | 1 |
| SMAD2  | CACATA GGTTCAGAGA ACTTAGCTATCT    | GTGTTCTGTGATTTATCCTTACTTCCCTA             | chr18:45360307-45360582  | 2 |
| SMAD2  | CATTCTGGCTTCTCAGCAGAA             | TATAATGGAA CAGAGAA GAGGCCAACT             | chr18:45360129-45360363  | 1 |
| SMAD2  | GAA CAGGGTCTGCA TCCATCATA         | CGTCTACTGCA TTTCCCA GCT                   | chr18:45359903-45360174  | 2 |
| SMAD2  | TGTA GGTGGGA GAAAGACATCAGTAT      | CTCTGATGGCATTA ACTTTGTAATGCAA             | chr18:45359695-45359954  | 1 |
| SMAD2  | ACA GGTAA GGCACAA CAAAGTAAAAAGT   | ACA GCTGGTTTCAA GTTAAAA TTGTTGA           | chr18:45359545-45359750  | 2 |
| SMAD2  | AAAAATTAGTCCATA GATAAGTAAACAACCT  | GTGTGCATCATCTGTATGCTGTTT C                | chr18:45359449-45359598  | 1 |
| TGFBR1 | TTTTTCTAAGAATCTTCTCTTTTCCAGC      | TT CAGCTATA CACATGCTGTTGTGAT              | chr9:101891107-101891261 | 1 |
| TGFBR1 | GT CACAGAGACCACAGACAAAGTT         | CCAGTTCTAAAATCA CAGAGTATGAA GAGT          | chr9:101891210-101891453 | 2 |
| TGFBR1 | GGAAATGTTGTAGGATGGGAAAATGG        | CCA TCAACATGAGT GAGATGCA GA               | chr9:101894701-101894880 | 1 |
| TGFBR1 | CTGGACCAAGTGTGCTTCG               | AGATGTCTTAGGAAAAGGAGAAACAATTA TGT         | chr9:101894838-101895057 | 2 |
| TGFBR1 | TCTGGGTCACTCA TTAGTGCCCT          | TCCAAA CTCTCCAAATCGACCTT                  | chr9:101900054-101900227 | 1 |
| TGFBR1 | CTATTGTGTTACAA GAAAGCATTGGCA      | GATGGTTAGTCA CCAATCTGTAAA GACTT           | chr9:101900176-101900449 | 2 |
| TGFBR1 | GCCCAACCGAAATGTTAA TTTCTGT        | GCCTCCA CTTCTATTTTCATAGACATTAT            | chr9:101904786-101905061 | 1 |
| TGFBR1 | TGTA GTGATTCATTGAGTTTAATAATGCC    | AGCAA GTTCCA TTTCTTTACCAAGATAT            | chr9:101906850-101907082 | 2 |
| TGFBR1 | CCATGCTCATA GAGATTTGAAATCAAAGA    | GTTTAA GCTGAGTTT CAGCAATGATATGT           | chr9:101907022-101907266 | 1 |

|        |                                    |                                  |                          |   |
|--------|------------------------------------|----------------------------------|--------------------------|---|
| TGFBR1 | GAAAATGTCTGAAAGGAGGTTTCATCCA       | AGAAAGACAATCTTGAAACAATTCTGCT     | chr9:101908687-101908955 | 2 |
| TGFBR1 | AGGTGATCTTTTAAATGCCTTGGCAT         | AAAGTAGCAAACCTTTTGCTACTAAGCAG    | chr9:101909863-101910138 | 1 |
| TGFBR1 | AAATCTTATCCAGACCAATGGAAAAATGG      | AAAGCTGTAGAATTACATTTTGAAGCCTTC   | chr9:101911396-101911599 | 2 |
| TGFBR1 | AAAAACATTATCGCACTCAAGTCAACAG       | CATTTTCTGTCCTGGGAAAGAAAGC        | chr9:101911542-101911816 | 1 |
| TGFBR1 | GGGTCTTTCTGTGCACTATGAAC            | GGAAAACCTAGTGGTTCAGAAATCCTC      | chr9:101911768-101912028 | 2 |
| TGFBR1 | AGTGATTTACTCCTGGT TAGTACATTCTCA    | GCACTACTGGTATAGTACAATCCCATTT     | chr9:101911972-101912237 | 1 |
| TGFBR1 | TCACTTATTCAGAACATTACATGCCTTCA      | CTTCATTTCTTTAGTGGCTTAAGCACATTT   | chr9:101912179-101912451 | 2 |
| TGFBR1 | CTATTCTGAAAAATGCCTTTCTCCTACCA      | GGCTTACAGAAATCCACATAAATTTTCAC    | chr9:101912393-101912666 | 1 |
| TGFBR1 | GGGAAAGTCTGTCTAGCTGCTT             | ATGTGACTTTCTTGCACTCTGTATCTAT     | chr9:101912615-101912819 | 2 |
| TGFBR1 | CTAGGAAAGCGGAAAGGTA GTTAAATTTGA    | GGTGCACTGAATGCATTACAATAATTACAT   | chr9:101912759-101913000 | 1 |
| TGFBR1 | TGCGTACATTGCAACTGCTTAC             | CAGTGATAAAAAGGACTCGAAAACTGT      | chr9:101912948-101913207 | 2 |
| TGFBR1 | CTATGAAGTCTCTGCAGGGCTTTT           | ACATTAACAGAAAGCAACTCAATTCAGTGTA  | chr9:101913156-101913371 | 1 |
| TGFBR1 | GTCAAGAAAGAGAAAATGGGCCATT          | TCTCAAACCTCAATTCATTTGCTTCAATGAAA | chr9:101913318-101913588 | 2 |
| TGFBR1 | CATCATGGGAAAAATGCTTAGAGGTTACTA     | GATTTTCAAAAAGCAGATCTGGTAGGCTT    | chr9:101913487-101913743 | 1 |
| TGFBR1 | TTGTTGTTGTTTGGGCCATTCT             | AAAAATATCTTCAGCAAAAGTGGA TAACCT  | chr9:101913690-101913881 | 2 |
| TGFBR1 | AAAGTTGTAATACATGATTTCTCACTTTCATGT  | GTTTCTTCATTTTCAATACAGCCAATTGTG   | chr9:101913817-101914077 | 1 |
| TGFBR1 | TTTTTGGCTAGGGA TGGTTGATAAAC        | TTCTCTGGCTACTGACAAAAATGAAAT      | chr9:101914018-101914271 | 2 |
| TGFBR1 | TCTTCTGATAAATGTTGCGTCCAT           | CCTCTAATGACTGAAAGGAAATGGAAAGTG   | chr9:101914220-101914492 | 1 |
| TGFBR1 | GTAAAAACGGCTGATGGAAGTGTG           | ACCTTACCTGCTTATAAGGCGA           | chr9:101914435-101914662 | 2 |
| TGFBR1 | CCAGAAACAGTGGCCAGTTGTA             | GCCAAAGTACCCTTACAATTTGTAATAAA    | chr9:101914617-101914796 | 1 |
| TGFBR1 | CCATCAAGAAATCCAGATTTCAAGT          | ACGATTCTCCAGTGCAAGAAATAAAAAATAA  | chr9:101914741-101914956 | 2 |
| TGFBR1 | ACTATCCCATTA GACACATCATCAAAAAGC    | CTAGAAAGTCCAGCACTCTGAGAG         | chr9:101914897-101915163 | 1 |
| TGFBR1 | TCTGTTTGGATTA CTGGAATACCCATG       | CGTTGGCACAACGTGAAAAAGG           | chr9:101915107-101915378 | 2 |
| TGFBR1 | GTGAACTGAATATCATGAACCAATGTTTTGA    | GAGTAACTGAGCAACATAATACCCATACTT   | chr9:101915322-101915574 | 1 |
| TGFBR1 | CATCTCCAAGTTTGA GTTTATTTCTAT       | TCTCAGTACATTCGACTTCAATGGAAATT    | chr9:101915513-101915747 | 2 |
| TGFBR1 | GCITTAACAGTGAATCTCTGCTTTAAAG       | GCACTGCTTCAATCTTCTACTGTAG        | chr9:101915663-101915909 | 1 |
| TGFBR1 | GAAGA GTGATGTTTAAAGTCTAAACA        | CTAGTTGCCATCTACAGCAACTACAT       | chr9:101915853-101916011 | 2 |
| TGFBR1 | ATACGTTGGAATGAGTCA TGCCAT          | CTGACCCAAAGGCAACAGAGATCAC        | chr9:101915961-101916215 | 1 |
| TGFBR1 | GGCATGATGGA CTTGCTACAG             | AATCCAGCTTCAAAATGAAAGTAACTATCT   | chr9:101916168-101916374 | 2 |
| TGFBR1 | GCITTTGGAATAGGA TTGCTCTCACATTA     | ACGTCCATAGGCAACAATTGCTT          | chr9:101916314-101916503 | 1 |
| TGFBR2 | GGGCTGGTCTAGGAAACATGA              | GCGCGAGTGA CTCACTCA              | chr3:30647936-30648100   | 1 |
| TGFBR2 | ACAGGAGCCGGACTCCTGTG               | GCTGCTGTCA TAGACCGAG             | chr3:30648140-30648365   | 2 |
| TGFBR2 | CGGACTCCTGTGCAAGCTTC               | CCCGCTGCTGTCA TAGA               | chr3:30648148-30648368   | 1 |
| TGFBR2 | TTTCAAAACAGT TTTCACTTCTCTGT CATC   | AAATTAGCA GTGAGGGAGCATGA         | chr3:30664609-30664834   | 2 |
| TGFBR2 | TCTAATCTGATGTGAAGGAA TATTTTGCC     | CACCGTGTGTGCA GTGACTATCAT        | chr3:30686087-30686274   | 1 |
| TGFBR2 | ATCTTTCTCTCTCTCAGTTAATAACGAC       | CAGTCACTGTGTACTATGAGAAATACATT    | chr3:30686220-30686485   | 2 |
| TGFBR2 | CCCTCGCTTCAATGAA TCTCT             | TGCTCCACCTTAAAGAGAAAG            | chr3:30691730-30691983   | 1 |
| TGFBR2 | ACTTCTGACAGTACTT ACTTACCA          | TTCCAGGTTGAACTCAGCTTC            | chr3:30713065-30713281   | 2 |
| TGFBR2 | ATCTTCTACTGCTACCGGTAAAC            | CTGAAAGTGTCTGCTTCA GCTTG         | chr3:30713227-30713480   | 1 |
| TGFBR2 | CGCTTTGCTGAGGTCTATAAGGC            | GGTGA TCAAGCAATTGTTTCCC          | chr3:30713434-30713650   | 2 |
| TGFBR2 | CTGAGGAGCGGAAAGACGGAGTT            | CGAGGATATTGGAGCTTTGAGGT          | chr3:30713603-30713834   | 1 |
| TGFBR2 | CATGTGGGAGGCCCAAAGAT               | GGCCAAGCTCAAGGTAAGG              | chr3:30713774-30713974   | 2 |
| TGFBR2 | TTGTGAAAAATAAAGGCA GCTGGAATT       | GCAACACATGATCTTATTTTGAAGACAAGT   | chr3:30715534-30715802   | 1 |
| TGFBR2 | CATCTCACCATGCTCATTTCTTTG           | TCCAGAAATCTCTGCCACCTAAGA         | chr3:30729800-30730075   | 2 |
| TGFBR2 | CATGGTGCCCTTTGGATCTCT              | AGAAAGAGCTATTTGTA GTGTTAGGGA     | chr3:30732878-30733098   | 1 |
| TGFBR2 | CGGAGGAGAA GATTCTGAAGAC            | GCTTATCTTATGCAATGTCAAAAGGCATA    | chr3:30733044-30733302   | 2 |
| TGFBR2 | GGAGTGGGTGACATAGAGCAATC            | TCTCCAATAAAACCAATTTCTGGGAATAT    | chr3:30733250-30733514   | 1 |
| TGFBR2 | CCTTGA AAAAGACAAAGGAAAAACATCAA     | TGTACTTAGTCCATGGCCAGAAAG         | chr3:30733455-30733725   | 2 |
| TGFBR2 | AATCATTTCCCTGCTACGCACTTC           | GGGACATCTGTTCTGATTTTCTGC         | chr3:30733677-30733940   | 1 |
| TGFBR2 | CCCACTTTTACTTCACTGGGTT             | TGCTCCTTTTGA AAAAGGATGAAGG       | chr3:30733892-30734057   | 2 |
| TGFBR2 | CCTGCACTTATGTTACTA TTCTCTGCT       | GTCAATGCTGACAAATGATGATTTGTTG     | chr3:30733999-30734233   | 1 |
| TGFBR2 | GGCTGATGAAAGAGGATTTCAACT           | GTAAGTGTCTCCACACTTCAACA          | chr3:30734179-30734410   | 2 |
| TGFBR2 | ATCTCCAGTCCAGTTCACAAAA             | GGCTAACTGAGACCTTAAAGGAGT         | chr3:30734364-30734638   | 1 |
| TGFBR2 | GAAAGTTGGCTTTA TTGGAATAAAGG        | GACCTTTGTTGCCACATTCAAA           | chr3:30734583-30734803   | 2 |
| TGFBR2 | CAACCTTTGCA GAAATACTAGAGAGGA       | AATAAAATGAGACTTCCACCATCCAA       | chr3:30734752-30735026   | 1 |
| TGFBR2 | ACTGGTAGTGAGAAATCA GCTCTGT         | TGGACCA GTATTCTAGAACTCACCA       | chr3:30734973-30735231   | 2 |
| TGFBR2 | GCTGTTGCCA TTGACCTCTAG             | AGTACAGCTGAAAGTGTCCATAAAAGAAT    | chr3:30735183-30735457   | 1 |
| TGFBR2 | GACCAAGGAATAACATTCTGATGTTCTAA      | CTCACCTGAGTATTTGCTTTATTCATCT     | chr3:30735355-30735599   | 2 |
| TGFBR2 | GTCTCAAGCACTTATTTTATTTCTATGCAATTGT | CATAAATGCAAAATAAACCAATGAGGCAAA   | chr3:30735507-30735669   | 1 |

**Supplementary material S3. Characteristics of the polymorphisms detected in 275 healthy and PD individuals.** <sup>1</sup>Chromosome positions according to the NCBI database, build GRCh37. New variants, not present in dbSNP v153, are referred to as through their chromosome: bp position and type of variant: (-) deletion; (NN) insertion; and (N) SNP.

| Gene         | SNP ID           | Chromosome position <sup>1</sup> | Allele        | MAF      | SNV | Type            | Function prediction |                   |
|--------------|------------------|----------------------------------|---------------|----------|-----|-----------------|---------------------|-------------------|
|              |                  |                                  |               |          |     |                 | SIFT                | PolyPhen-2        |
| <i>TGFB2</i> | rs10482718       | 1: 218518742                     | A/G           | 0.02182  | SNP | 5'UTR           |                     |                   |
| <i>TGFB2</i> | rs11466365       | 1: 218519028                     | C/T           | 0.001818 | SNP | 5'UTR           |                     |                   |
| <i>TGFB2</i> | rs148765724      | 1: 218519706                     | T/A           | 0.001818 | SNP | 5'UTR           |                     |                   |
| <i>TGFB2</i> | 1:218519756 (-)  | 1: 218519756                     | A/-           | 0.01273  | DEL | 5'UTR           |                     |                   |
| <i>TGFB2</i> | 1:218519880 (G)  | 1: 218519880                     | G/GT          | 0.06727  | INS | 5'UTR           |                     |                   |
| <i>TGFB2</i> | rs113711540      | 1: 218519928                     | A/AAAAC       | 0.2691   | INS | 5'UTR           |                     |                   |
| <i>TGFB2</i> | 1:218519942 (-)  | 1: 218519942                     | A/-           | 0.01636  | DEL | 5'UTR           |                     |                   |
| <i>TGFB2</i> | rs200186989      | 1: 218519992                     | T/-           | 0.05455  | DEL | 5'UTR           |                     |                   |
| <i>TGFB2</i> | 1:218520003 (C)  | 1: 218520003                     | C/CT          | 0.01273  | INS | 5'UTR           |                     |                   |
| <i>TGFB2</i> | rs780635221      | 1: 218520020                     | C/A           | 0.04545  | SNP | 5'UTR           |                     |                   |
| <i>TGFB2</i> | rs781099061      | 1: 218520020                     | C/CT          | 0.02     | INS | 5'UTR           |                     |                   |
| <i>TGFB2</i> | rs748018397      | 1: 218520021                     | T/-           | 0.001818 | DEL | 5'UTR           |                     |                   |
| <i>TGFB2</i> | rs779785854      | 1: 218520028                     | T/C           | 0.001818 | SNP | 5'UTR           |                     |                   |
| <i>TGFB2</i> | rs769838909      | 1: 218520033                     | T/-           | 0.03818  | DEL | 5'UTR           |                     |                   |
| <i>TGFB2</i> | 1:218520038 (-)  | 1: 218520038                     | A/-           | 0.009091 | DEL | 5'UTR           |                     |                   |
| <i>TGFB2</i> | rs200702935      | 1: 218520039                     | A/T           | 0.18     | SNP | 5'UTR           |                     |                   |
| <i>TGFB2</i> | 1:218520044 (T)  | 1: 218520044                     | A/T           | 0.007273 | SNP | Missense M->L   | MIL                 | benign            |
| <i>TGFB2</i> | 1:218520046 (G)  | 1: 218520046                     | G/GT          | 0.01273  | INS | Frameshift      |                     |                   |
| <i>TGFB2</i> | rs371241859      | 1: 218520279                     | A/G           | 0.001818 | SNP | Missense Q->R   | Q79R                | benign            |
| <i>TGFB2</i> | rs10482721       | 1: 218520315                     | G/A           | 0.005455 | SNP | Missense R->H   | R91H                | probably damaging |
| <i>TGFB2</i> | rs746220497      | 1: 218520414                     | C/A           | 0.001818 | SNP | Intron          |                     |                   |
| <i>TGFB2</i> | 1:218578501 (-)  | 1: 218578501                     | T/-           | 0.3545   | DEL | Intron          |                     |                   |
| <i>TGFB2</i> | rs10482810       | 1: 218607532                     | G/C           | 0.003636 | SNP | Missense V->L   | V235L               | probably damaging |
| <i>TGFB2</i> | rs1375664478 (C) | 1: 218607609                     | C/T           | 0.001818 | SNP | Intron          |                     |                   |
| <i>TGFB2</i> | 1:218607759 (T)  | 1: 218607759                     | T/TA          | 0.07636  | INS | Frameshift      |                     |                   |
| <i>TGFB2</i> | rs976149098      | 1: 218607817                     | G/-           | 0.03455  | DEL | Intron          |                     |                   |
| <i>TGFB2</i> | 1:218607828 (-)  | 1: 218607828                     | G/-           | 0.007273 | DEL | Intron          |                     |                   |
| <i>TGFB2</i> | rs774207422      | 1: 218607831                     | T/C           | 0.001818 | SNP | Intron          |                     |                   |
| <i>TGFB2</i> | rs10482812       | 1: 218607861                     | T/C           | 0.007273 | SNP | Intron          |                     |                   |
| <i>TGFB2</i> | rs1286186794     | 1: 218609371                     | A/-           | 0.007273 | DEL | Frameshift      |                     |                   |
| <i>TGFB2</i> | rs767012850      | 1: 218610662                     | C/CT          | 0.2564   | INS | Intron          |                     |                   |
| <i>TGFB2</i> | rs11285412       | 1: 218610663                     | T/-           | 0.3273   | DEL | Intron          |                     |                   |
| <i>TGFB2</i> | rs147678881      | 1: 218610736                     | G/A           | 0.001818 | SNP | Synonymous R->R |                     |                   |
| <i>TGFB2</i> | 1:218614525 (C)  | 1: 218614525                     | T/C           | 0.001818 | SNP | Intron          |                     |                   |
| <i>TGFB2</i> | rs11466412       | 1: 218614743                     | G/A           | 0.003636 | SNP | 3'UTR           |                     |                   |
| <i>TGFB2</i> | 1:218614780 (A)  | 1: 218614780                     | G/A           | 0.001818 | SNP | 3'UTR           |                     |                   |
| <i>TGFB2</i> | 1:218614852 (G)  | 1: 218614852                     | A/G           | 0.01818  | SNP | 3'UTR           |                     |                   |
| <i>TGFB2</i> | 1:218614899 (-)  | 1: 218614899                     | A/-           | 0.03636  | DEL | 3'UTR           |                     |                   |
| <i>TGFB2</i> | rs900            | 1: 218614905                     | A/T           | 0.3036   | SNP | 3'UTR           |                     |                   |
| <i>TGFB2</i> | 1:218614962 (T)  | 1: 218614962                     | A/T           | 0.01091  | SNP | 3'UTR           |                     |                   |
| <i>TGFB2</i> | 1:218614963 (AT) | 1: 218614963                     | A/AT          | 0.02545  | INS | 3'UTR           |                     |                   |
| <i>TGFB2</i> | rs1321255058 (A) | 1: 218614964                     | T/A           | 0.001818 | SNP | 3'UTR           |                     |                   |
| <i>TGFB2</i> | rs1282624256     | 1: 218614964                     | T/-           | 0.02909  | DEL | 3'UTR           |                     |                   |
| <i>TGFB2</i> | 1:218614983 (TA) | 1: 218614983                     | T/TA          | 0.12     | INS | 3'UTR           |                     |                   |
| <i>TGFB2</i> | 1:218615025 (GA) | 1: 218615025                     | CAACAG/GACAAG | 0.05455  | MNP | 3'UTR           |                     |                   |
| <i>TGFB2</i> | 1:218615203 (G)  | 1: 218615203                     | G/GT          | 0.01455  | INS | 3'UTR           |                     |                   |
| <i>TGFB2</i> | 1:218615438 (-)  | 1: 218615438                     | A/-           | 0.007273 | DEL | 3'UTR           |                     |                   |
| <i>TGFB2</i> | rs991967         | 1: 218615451                     | A/C           | 0.3164   | SNP | 3'UTR           |                     |                   |
| <i>TGFB2</i> | rs545208462      | 1: 218615493                     | T/-           | 0.4436   | DEL | 3'UTR           |                     |                   |

|              |                  |              |       |          |     |                 |       |                   |
|--------------|------------------|--------------|-------|----------|-----|-----------------|-------|-------------------|
| <i>TGFB2</i> | rs56271792       | 1: 218615832 | G/A   | 0.02545  | SNP | 3'UTR           |       |                   |
| <i>TGFB2</i> | rs752019003      | 1: 218615835 | T/C   | 0.001818 | SNP | 3'UTR           |       |                   |
| <i>TGFB2</i> | rs532376886      | 1: 218615927 | A/A/T | 0.01636  | INS | 3'UTR           |       |                   |
| <i>TGFB2</i> | rs532935567      | 1: 218615928 | T/-   | 0.3836   | DEL | 3'UTR           |       |                   |
| <i>TGFB2</i> | 1:218615929 (A)  | 1: 218615929 | T/A   | 0.001818 | SNP | 3'UTR           |       |                   |
| <i>TGFB2</i> | rs143593418      | 1: 218615977 | T/C   | 0.001818 | SNP | 3'UTR           |       |                   |
| <i>TGFB2</i> | rs1418556        | 1: 218616014 | C/T   | 0.2818   | SNP | 3'UTR           |       |                   |
| <i>TGFB2</i> | rs201094302      | 1: 218616014 | C/-   | 0.04364  | DEL | 3'UTR           |       |                   |
| <i>TGFB2</i> | 1:218616143 (G)  | 1: 218616143 | A/G   | 0.001818 | SNP | 3'UTR           |       |                   |
| <i>TGFB2</i> | rs17500758       | 1: 218616206 | T/C   | 0.04364  | SNP | 3'UTR           |       |                   |
| <i>TGFB2</i> | rs3737977        | 1: 218616328 | T/A   | 0.07273  | SNP | 3'UTR           |       |                   |
| <i>TGFB2</i> | rs1245924020 (I) | 1: 218616498 | C/A   | 0.001818 | SNP | 3'UTR           |       |                   |
| <i>TGFB2</i> | 1:218616750 (-)  | 1: 218616750 | T/-   | 0.01636  | DEL | 3'UTR           |       |                   |
| <i>TGFB2</i> | rs17047869       | 1: 218616892 | T/C   | 0.003636 | SNP | 3'UTR           |       |                   |
| <i>TGFB2</i> | rs1442089565     | 1: 218616892 | T/-   | 0.009091 | DEL | 3'UTR           |       |                   |
| <i>TGFB2</i> | rs753394620      | 1: 218616910 | T/C   | 0.001818 | SNP | 3'UTR           |       |                   |
| <i>TGFB2</i> | rs1313656124     | 1: 218617051 | G/G/T | 0.2491   | INS | 3'UTR           |       |                   |
| <i>TGFB2</i> | rs3054943        | 1: 218617052 | T/-   | 0.2664   | DEL | 3'UTR           |       |                   |
| <i>TGFB2</i> | rs1046017        | 1: 218617135 | C/G   | 0.3139   | SNP | 3'UTR           |       |                   |
| <i>TGFB2</i> | rs77808075       | 1: 218617268 | A/G   | 0.001818 | SNP | 3'UTR           |       |                   |
| <i>TGFB2</i> | rs746790035      | 1: 218617332 | G/A   | 0.001818 | SNP | 3'UTR           |       |                   |
| <i>TGFB2</i> | rs6704255        | 1: 218617543 | G/A   | 0.3109   | SNP | 3'UTR           |       |                   |
| <i>TGFB2</i> | 1:218617843 (-)  | 1: 218617843 | A/-   | 0.07636  | DEL | 3'UTR           |       |                   |
| <i>TGFB2</i> | rs6683598        | 1: 218617900 | C/T   | 0.3127   | SNP | 3'UTR           |       |                   |
| <i>TGFB2</i> | rs1057139879     | 3: 30647979  | G/A   | 0.009091 | SNP | upstream        |       |                   |
| <i>TGFB2</i> | rs749340193      | 3: 30648069  | C/T   | 0.001818 | SNP | 5'UTR           |       |                   |
| <i>TGFB2</i> | rs2306856        | 3: 30648248  | C/G   | 0.001818 | SNP | 5'UTR           |       |                   |
| <i>TGFB2</i> | rs1155705        | 3: 30686414  | A/G   | 0.3309   | SNP | intron          |       |                   |
| <i>TGFB2</i> | rs754721647      | 3: 30686423  | A/-   | 0.001818 | DEL | intron          |       |                   |
| <i>TGFB2</i> | rs756007977      | 3: 30691871  | G/G/A | 0.08545  | INS | Frameshift      |       |                   |
| <i>TGFB2</i> | rs752580104      | 3: 30691872  | A/-   | 0.3855   | DEL | Frameshift      |       |                   |
| <i>TGFB2</i> | rs11466512       | 3: 30713126  | T/A   | 0.3473   | SNP | intron          |       |                   |
| <i>TGFB2</i> | rs2229102        | 3: 30713674  | A/G   | 0.005455 | SNP | Synonymous L->L |       |                   |
| <i>TGFB2</i> | rs755843367      | 3: 30713723  | C/T   | 0.001818 | SNP | Synonymous L->L |       |                   |
| <i>TGFB2</i> | rs113194608      | 3: 30713737  | C/T   | 0.001818 | SNP | Synonymous L->L |       |                   |
| <i>TGFB2</i> | rs35719192       | 3: 30713794  | G/A   | 0.005455 | SNP | Missense M->I   | M373I | benign            |
| <i>TGFB2</i> | rs35766612       | 3: 30713834  | G/A   | 0.007273 | SNP | Missense V->M   | V367M | probably damaging |
| <i>TGFB2</i> | rs2228048        | 3: 30713842  | C/T   | 0.005455 | SNP | Synonymous N->N |       |                   |
| <i>TGFB2</i> | rs2228047        | 3: 30715608  | A/G   | 0.003636 | SNP | Synonymous A->A |       |                   |
| <i>TGFB2</i> | rs149112005      | 3: 30733196  | G/A   | 0.001818 | SNP | 3'UTR           |       |                   |
| <i>TGFB2</i> | rs143024112      | 3: 30733240  | A/T   | 0.001818 | SNP | 3'UTR           |       |                   |
| <i>TGFB2</i> | rs199931498      | 3: 30733399  | T/-   | 0.003636 | DEL | 3'UTR           |       |                   |
| <i>TGFB2</i> | rs35934901       | 3: 30733402  | T/A/- | 0.5      | DEL | 3'UTR           |       |                   |
| <i>TGFB2</i> | rs304840         | 3: 30733421  | C/A   | 0.007273 | SNP | 3'UTR           |       |                   |
| <i>TGFB2</i> | 3:30733815 (-)   | 3: 30733815  | G/-   | 0.05636  | DEL | 3'UTR           |       |                   |
| <i>TGFB2</i> | rs11466531       | 3: 30733838  | C/G   | 0.04182  | SNP | 3'UTR           |       |                   |
| <i>TGFB2</i> | rs17026332       | 3: 30733926  | C/A   | 0.02545  | SNP | 3'UTR           |       |                   |
| <i>TGFB2</i> | 3:30734109 (C)   | 3: 30734109  | A/C   | 0.001818 | SNP | 3'UTR           |       |                   |
| <i>TGFB2</i> | 3:30734410 (T)   | 3: 30734410  | C/T   | 0.001818 | SNP | 3'UTR           |       |                   |
| <i>TGFB2</i> | rs139938413      | 3: 30734598  | A/G   | 0.001818 | SNP | 3'UTR           |       |                   |
| <i>TGFB2</i> | rs190586104      | 3: 30734653  | T/C   | 0.001818 | SNP | 3'UTR           |       |                   |
| <i>TGFB2</i> | 3:30734697 (G)   | 3: 30734697  | T/G   | 0.001818 | SNP | 3'UTR           |       |                   |
| <i>TGFB2</i> | rs6550008        | 3: 30734900  | A/G   | 0.005455 | SNP | 3'UTR           |       |                   |
| <i>TGFB2</i> | rs146296952      | 3: 30734906  | C/T   | 0.001818 | SNP | 3'UTR           |       |                   |
| <i>TGFB2</i> | rs1803446        | 3: 30734924  | A/C   | 0.02909  | SNP | 3'UTR           |       |                   |

|               |                       |                        |            |          |     |                 |       |  |                   |
|---------------|-----------------------|------------------------|------------|----------|-----|-----------------|-------|--|-------------------|
| <i>TGFBR2</i> | rs188109487           | 3: 30735078            | T/A        | 0.001818 | SNP | 3'UTR           |       |  |                   |
| <i>TGFBR2</i> | rs1054883228          | 3: 30735112            | T/G        | 0.001818 | SNP | 3'UTR           |       |  |                   |
| <i>TGFBR2</i> | rs11466536            | 3: 30735156            | C/T        | 0.06     | SNP | 3'UTR           |       |  |                   |
| <i>TGFBR2</i> | rs11466537            | 3: 30735176            | T/A        | 0.005455 | SNP | 3'UTR           |       |  |                   |
| <i>TGFBR2</i> | 3:30735319 (GT        | 3: 30735319            | G/GT       | 0.05818  | INS | 3'UTR           |       |  |                   |
| <i>TGFBR2</i> | 3:30735324 (TT        | 3: 30735324            | T/TTG      | 0.009091 | INS | 3'UTR           |       |  |                   |
| <i>TGFBR2</i> | rs947525889           | 3: 30735324            | G/T        | 0.009091 | SNP | 3'UTR           |       |  |                   |
| <i>TGFBR2</i> | rs542768261           | 3: 30735330            | G/GT       | 0.2109   | INS | 3'UTR           |       |  |                   |
| <i>TGFBR2</i> | rs1282623826          | 3: 30735331            | T/-        | 0.09818  | DEL | 3'UTR           |       |  |                   |
| <i>TGFBR2</i> | 3:30735349 (G/        | 3: 30735349            | G/GA       | 0.09091  | INS | 3'UTR           |       |  |                   |
| <i>TGFBR2</i> | 3:30735350 (-)        | 3: 30735350            | T/-        | 0.003636 | DEL | 3'UTR           |       |  |                   |
| <i>TGFBR2</i> | 3:30735396 (CT        | 3: 30735396            | C/CT       | 0.02     | INS | 3'UTR           |       |  |                   |
| <i>TGFBR1</i> | rs145033378           | 9: 101891246           | C/T        | 0.001818 | SNP | Synonymous S->S |       |  |                   |
| <i>TGFBR1</i> | rs1321978114          | 9: 101891397           | A/AAT      | 0.03818  | INS | Intron          |       |  |                   |
| <i>TGFBR1</i> | rs56014374            | 9: 101894904           | G/A        | 0.02     | SNP | Missense V->I   | V153I |  | benign            |
| <i>TGFBR1</i> | rs7861780             | 9: 101907165           | A/C        | 0.007273 | SNP | Synonymous T->T |       |  |                   |
| <i>TGFBR1</i> | rs746666082           | 9: 101908774           | G/T        | 0.001818 | SNP | Missense A->S   | A380S |  | probably damaging |
| <i>TGFBR1</i> | rs863223825           | 9: 101908802           | A/G        | 0.001818 | SNP | Missense N->S   | N393S |  | probably damaging |
| <i>TGFBR1</i> | rs334354              | 9: 101908915           | G/A        | 0.1873   | SNP | Intron          |       |  |                   |
| <i>TGFBR1</i> | 9:101908916 (-)       | 9: 101908916           | T/-        | 0.005455 | DEL | Intron          |       |  |                   |
| <i>TGFBR1</i> | rs766851280           | 9: 101909316           | T/-        | 0.001818 | DEL | Intron          |       |  |                   |
| <i>TGFBR1</i> | rs752215820           | 9: 101911436           | A/AAT      | 0.3727   | INS | Intron          |       |  |                   |
| <i>TGFBR1</i> | rs778258700           | 9: 101911437           | T/-        | 0.1673   | DEL | Intron          |       |  |                   |
| <i>TGFBR1</i> | 9:101911613 (CT)      | 9: 101911613           | C/CT       | 0.03636  | INS | 3'UTR           |       |  |                   |
| <i>TGFBR1</i> | rs1473423734          | 9: 101911630           | C/T        | 0.001818 | SNP | 3'UTR           |       |  |                   |
| <i>TGFBR1</i> | rs868                 | 9: 101911656           | A/G        | 0.1836   | SNP | 3'UTR           |       |  |                   |
| <i>TGFBR1</i> | 9:101911730 (T)       | 9: 101911730           | A/T        | 0.001818 | SNP | 3'UTR           |       |  |                   |
| <i>TGFBR1</i> | rs145692006           | 9: 101911947           | A/G        | 0.003636 | SNP | 3'UTR           |       |  |                   |
| <i>TGFBR1</i> | rs201269197           | 9: 101912089           | T/C        | 0.001818 | SNP | 3'UTR           |       |  |                   |
| <i>TGFBR1</i> | 9:101912090 (TA       | 9: 101912090           | T/TA       | 0.003636 | INS | 3'UTR           |       |  |                   |
| <i>TGFBR1</i> | rs866132758           | 9: 101912151           | A/G        | 0.001818 | SNP | 3'UTR           |       |  |                   |
| <i>TGFBR1</i> | rs201687617           | 9: 101912161           | G/A        | 0.003636 | SNP | 3'UTR           |       |  |                   |
| <i>TGFBR1</i> | rs1315984960          | 9: 101912440           | A/G        | 0.001818 | SNP | 3'UTR           |       |  |                   |
| <i>TGFBR1</i> | rs334348              | 9: 101912471           | A/G        | 0.2618   | SNP | 3'UTR           |       |  |                   |
| <i>TGFBR1</i> | rs923536988           | 9: 101912667           | A/AAT      | 0.2899   | INS | 3'UTR           |       |  |                   |
| <i>TGFBR1</i> | rs200689459           | 9: 101912827           | G/A        | 0.001818 | SNP | 3'UTR           |       |  |                   |
| <i>TGFBR1</i> | rs11568811            | 9: 101913015           | G/C        | 0.009091 | SNP | 3'UTR           |       |  |                   |
| <i>TGFBR1</i> | rs760928585           | 9: 101913042           | T/C        | 0.001818 | SNP | 3'UTR           |       |  |                   |
| <i>TGFBR1</i> | rs780605360           | 9: 101913273           | T/A/-      | 0.001818 | DEL | 3'UTR           |       |  |                   |
| <i>TGFBR1</i> | rs181403208           | 9: 101913284           | C/T        | 0.007273 | SNP | 3'UTR           |       |  |                   |
| <i>TGFBR1</i> | rs201191009           | 9: 101913359           | A/C        | 0.001818 | SNP | 3'UTR           |       |  |                   |
| <i>TGFBR1</i> | 9:101913393 (TA       | 9: 101913393           | T/TA       | 0.02727  | INS | 3'UTR           |       |  |                   |
| <i>TGFBR1</i> | 9:101913536 (G)       | 9: 101913536           | G/GT       | 0.07273  | INS | 3'UTR           |       |  |                   |
| <i>TGFBR1</i> | 9:101913654 (CT       | 9: 101913654           | C/CT       | 0.02545  | INS | 3'UTR           |       |  |                   |
| <i>TGFBR1</i> | rs879166510           | 9: 101913668           | G/GT       | 0.05273  | INS | 3'UTR           |       |  |                   |
| <i>TGFBR1</i> | rs75796733            | 9: 101913669           | T/-        | 0.01273  | DEL | 3'UTR           |       |  |                   |
| <i>TGFBR1</i> | rs201152885           | 9: 101913678           | T/G        | 0.01636  | SNP | 3'UTR           |       |  |                   |
| <i>TGFBR1</i> | 9:101913678-101913680 | 9: 101913678-101913680 | TTTG/TTGTT | 0.007273 | MNP | 3'UTR           |       |  |                   |
| <i>TGFBR1</i> | rs199545273           | 9: 101913679           | G/T        | 0.2127   | SNP | 3'UTR           |       |  |                   |
| <i>TGFBR1</i> | rs202187266           | 9: 101913680           | T/G        | 0.007273 | SNP | 3'UTR           |       |  |                   |
| <i>TGFBR1</i> | rs532530728           | 9: 101913687           | T/G        | 0.009091 | SNP | 3'UTR           |       |  |                   |
| <i>TGFBR1</i> | 9:101913688 (G)       | 9: 101913688           | T/G        | 0.009091 | SNP | 3'UTR           |       |  |                   |
| <i>TGFBR1</i> | 9:101913689 (G)       | 9: 101913689           | T/G        | 0.02     | SNP | 3'UTR           |       |  |                   |
| <i>TGFBR1</i> | rs886063239           | 9: 101913689           | T/TG       | 0.001818 | INS | 3'UTR           |       |  |                   |
| <i>TGFBR1</i> | rs7871490             | 9: 101913690           | T/G        | 0.09636  | SNP | 3'UTR           |       |  |                   |



|               |                  |              |       |          |     |                               |       |        |  |
|---------------|------------------|--------------|-------|----------|-----|-------------------------------|-------|--------|--|
| <i>TGFBR1</i> | rs36064078       | 9: 101913690 | T/TG  | 0.03636  | INS | 3'UTR                         |       |        |  |
| <i>TGFBR1</i> | 9:101913692-10'  | 9: 101913692 | TG/GT | 0.005455 | INV | 3'UTR                         |       |        |  |
| <i>TGFBR1</i> | rs201054018      | 9: 101913693 | G/T   | 0.02909  | SNP | 3'UTR                         |       |        |  |
| <i>TGFBR1</i> | rs1274989626     | 9: 101913696 | G/T   | 0.007273 | SNP | 3'UTR                         |       |        |  |
| <i>TGFBR1</i> | 9:101913958 (AT) | 9: 101913958 | A/AAT | 0.001818 | INS | 3'UTR                         |       |        |  |
| <i>TGFBR1</i> | rs17724567       | 9: 101914232 | A/C   | 0.007273 | SNP | 3'UTR                         |       |        |  |
| <i>TGFBR1</i> | rs200274678 (C)  | 9: 101914386 | C/G   | 0.001818 | SNP | 3'UTR                         |       |        |  |
| <i>TGFBR1</i> | rs334349         | 9: 101914387 | G/A   | 0.2636   | SNP | 3'UTR                         |       |        |  |
| <i>TGFBR1</i> | 9:101914443 (-)  | 9: 101914443 | G/-   | 0.1873   | DEL | 3'UTR                         |       |        |  |
| <i>TGFBR1</i> | rs997094252      | 9: 101914748 | A/G   | 0.001818 | SNP | 3'UTR                         |       |        |  |
| <i>TGFBR1</i> | rs201114226      | 9: 101914843 | A/C   | 0.001818 | SNP | 3'UTR                         |       |        |  |
| <i>TGFBR1</i> | rs117440593      | 9: 101914848 | T/C   | 0.003636 | SNP | 3'UTR                         |       |        |  |
| <i>TGFBR1</i> | rs420549         | 9: 101914873 | G/C   | 0.1873   | SNP | 3'UTR                         |       |        |  |
| <i>TGFBR1</i> | rs41283640       | 9: 101915627 | T/A   | 0.003636 | SNP | 3'UTR                         |       |        |  |
| <i>TGFBR1</i> | 9:101915704 (G/) | 9: 101915704 | G/GA  | 0.01273  | INS | 3'UTR                         |       |        |  |
| <i>TGFBR1</i> | 9:101915764 (G/) | 9: 101915764 | G/GA  | 0.02364  | INS | 3'UTR                         |       |        |  |
| <i>TGFBR1</i> | 9:101915793 (G1) | 9: 101915793 | G/GT  | 0.04396  | INS | 3'UTR                         |       |        |  |
| <i>TGFBR1</i> | rs41283642       | 9: 101915887 | C/T   | 0.02364  | SNP | 3'UTR                         |       |        |  |
| <i>TGFBR1</i> | rs7850895        | 9: 101916076 | T/C   | 0.09636  | SNP | 3'UTR                         |       |        |  |
| <i>TGFBR1</i> | rs41274644       | 9: 101916080 | G/A   | 0.005455 | SNP | 3'UTR                         |       |        |  |
| <i>TGFBR1</i> | rs79641064       | 9: 101916086 | G/A   | 0.03091  | SNP | 3'UTR                         |       |        |  |
| <i>TGFBR1</i> | rs1590           | 9: 101916165 | T/G   | 0.2673   | SNP | 3'UTR                         |       |        |  |
| <i>TGFBR1</i> | rs202059366      | 9: 101916171 | C/T   | 0.001818 | SNP | 3'UTR                         |       |        |  |
| <i>TGFBR1</i> | rs200806851      | 9: 101916210 | G/C   | 0.001818 | SNP | 3'UTR                         |       |        |  |
| <i>TGFBR1</i> | 9:101916329 (G)  | 9: 101916329 | A/G   | 0.001818 | SNP | 3'UTR                         |       |        |  |
| <i>TGFBR1</i> | rs561572489      | 9: 101916380 | A/AAT | 0.2382   | INS | 3'UTR                         |       |        |  |
| <i>TGFBR1</i> | rs968481994      | 9: 101916381 | T/-   | 0.1      | DEL | 3'UTR                         |       |        |  |
| <i>TGFBR1</i> | rs185400896      | 9: 101916396 | A/T   | 0.001818 | SNP | 3'UTR                         |       |        |  |
| <i>TGFBR1</i> | rs35118283       | 9: 101916441 | A/-   | 0.06     | DEL | 3'UTR                         |       |        |  |
| <i>SMAD3</i>  | rs918127087      | 15: 67357135 | G/A   | 0.001818 | SNP | Upstream                      |       |        |  |
| <i>SMAD3</i>  | rs899894403      | 15: 67357321 | T/C   | 0.009091 | SNP | Upstream                      |       |        |  |
| <i>SMAD3</i>  | 15:67357411 (-)  | 15: 67357411 | G/-   | 0.2545   | DEL | Upstream                      |       |        |  |
| <i>SMAD3</i>  | 15:67357991 (-)  | 15: 67357991 | C/-   | 0.2218   | DEL | Upstream                      |       |        |  |
| <i>SMAD3</i>  | 15:67357993 (-)  | 15: 67357993 | G/-   | 0.01455  | DEL | Upstream                      |       |        |  |
| <i>SMAD3</i>  | rs1241962534     | 15: 67358099 | G/A   | 0.001818 | SNP | Upstream                      |       |        |  |
| <i>SMAD3</i>  | 15:67358388 (A)  | 15: 67358388 | G/A   | 0.001825 | SNP | 5'UTR                         |       |        |  |
| <i>SMAD3</i>  | rs144374592      | 15: 67358465 | C/T   | 0.00365  | SNP | 5'UTR                         |       |        |  |
| <i>SMAD3</i>  | rs36221703       | 15: 67358470 | C/T   | 0.001818 | SNP | 5'UTR                         |       |        |  |
| <i>SMAD3</i>  | rs1061427        | 15: 67358478 | G/A   | 0.2198   | SNP | 5'UTR                         |       |        |  |
| <i>SMAD3</i>  | rs11636161       | 15: 67418104 | G/A   | 0.3164   | SNP | 5'UTR                         |       |        |  |
| <i>SMAD3</i>  | rs16950635       | 15: 67418205 | G/A   | 0.06364  | SNP | 5'UTR                         |       |        |  |
| <i>SMAD3</i>  | rs8028147        | 15: 67418233 | G/A   | 0.2709   | SNP | 5'UTR                         |       |        |  |
| <i>SMAD3</i>  | rs1172546213     | 15: 67430390 | C/T   | 0.001818 | SNP | Missense T -> M T9M isoform 2 |       |        |  |
| <i>SMAD3</i>  | rs1065080        | 15: 67457335 | G/A   | 0.1073   | SNP | Synonymous L->L               |       |        |  |
| <i>SMAD3</i>  | rs200305159      | 15: 67457480 | T/TTC | 0.04182  | INS | Intron                        |       |        |  |
| <i>SMAD3</i>  | rs2289261        | 15: 67457485 | C/G   | 0.3636   | SNP | Intron                        |       |        |  |
| <i>SMAD3</i>  | 15:67457494 (T)  | 15: 67457494 | T/TTC | 0.003636 | INS | Intron                        |       |        |  |
| <i>SMAD3</i>  | rs869167666      | 15: 67457495 | C/-   | 0.007273 | DEL | Intron                        |       |        |  |
| <i>SMAD3</i>  | rs200689238      | 15: 67457507 | C/T   | 0.003636 | SNP | Intron                        |       |        |  |
| <i>SMAD3</i>  | rs863223759      | 15: 67457640 | C/-   | 0.07818  | DEL | Frameshift                    |       |        |  |
| <i>SMAD3</i>  | rs35874463       | 15: 67457698 | A/G   | 0.04727  | SNP | Missense I -> V               | I170V | benign |  |
| <i>SMAD3</i>  | 15:67457726 (-)  | 15: 67457726 | G/-   | 0.005455 | DEL | intron                        |       |        |  |
| <i>SMAD3</i>  | rs56336520       | 15: 67457840 | G/A   | 0.02     | SNP | Intron                        |       |        |  |
| <i>SMAD3</i>  | rs2289259        | 15: 67457850 | G/A   | 0.08182  | SNP | Intron                        |       |        |  |
| <i>SMAD3</i>  | rs761730786      | 15: 67458399 | G/A   | 0.001818 | SNP | Intron                        |       |        |  |

|              |                  |              |         |          |     |                 |       |                   |
|--------------|------------------|--------------|---------|----------|-----|-----------------|-------|-------------------|
| <i>SMAD3</i> | rs189793484      | 15: 67458427 | G/T     | 0.001818 | SNP | Intron          |       |                   |
| <i>SMAD3</i> | rs186178811      | 15: 67458607 | A/G     | 0.001818 | SNP | Intron          |       |                   |
| <i>SMAD3</i> | rs536010162      | 15: 67459279 | C/T     | 0.007273 | SNP | Intron          |       |                   |
| <i>SMAD3</i> | rs56070432       | 15: 67463000 | C/T     | 0.02545  | SNP | Intron          |       |                   |
| <i>SMAD3</i> | rs61258186       | 15: 67463041 | C/T     | 0.003636 | SNP | Intron          |       |                   |
| <i>SMAD3</i> | rs1278345256     | 15: 67473676 | G/A     | 0.01316  | SNP | Synonymous Q->Q |       |                   |
| <i>SMAD3</i> | 1:67473677 (T)   | 15: 67473677 | C/T     | 0.01124  | SNP | Intron          |       |                   |
| <i>SMAD3</i> | 1:67473678 (T)   | 15: 67473678 | C/T     | 0.001873 | SNP | Intron          |       |                   |
| <i>SMAD3</i> | rs1320490523 (T) | 15: 67473736 | G/A     | 0.001818 | SNP | Synonymous G->G |       |                   |
| <i>SMAD3</i> | rs984900419 (A)  | 15: 67473742 | C/A     | 0.2521   | SNP | Synonymous L->L |       |                   |
| <i>SMAD3</i> | rs730880214      | 15: 67473780 | G/A     | 0.008097 | SNP | Missense R->Q   | R287Q | probably damaging |
| <i>SMAD3</i> | rs117185005      | 15: 67473790 | C/T     | 0.01562  | SNP | Synonymous I->I |       |                   |
| <i>SMAD3</i> | 15:67473800 (G)  | 15: 67473800 | T/G     | 0.05921  | SNP | Intron          |       |                   |
| <i>SMAD3</i> | rs745896273      | 15: 67473813 | C/T     | 0.006522 | SNP | Intron          |       |                   |
| <i>SMAD3</i> | rs775394029      | 15: 67473816 | C/T     | 0.002165 | SNP | Intron          |       |                   |
| <i>SMAD3</i> | 15:67473817 (T)  | 15: 67473817 | C/T     | 0.01299  | SNP | Intron          |       |                   |
| <i>SMAD3</i> | 15:67473819 (C)  | 15: 67473819 | C/C/T   | 0.004329 | INS | Intron          |       |                   |
| <i>SMAD3</i> | rs761694392      | 15: 67473820 | C/A     | 0.02381  | SNP | Intron          |       |                   |
| <i>SMAD3</i> | rs200703402      | 15: 67473821 | C/T     | 0.004329 | SNP | Intron          |       |                   |
| <i>SMAD3</i> | rs536505804      | 15: 67473822 | A/C     | 0.0678   | SNP | Intron          |       |                   |
| <i>SMAD3</i> | rs776577220      | 15: 67477061 | G/A     | 0.001812 | SNP | intron          |       |                   |
| <i>SMAD3</i> | rs753875974      | 15: 67479785 | C/T     | 0.003636 | SNP | Synonymous Y->Y |       |                   |
| <i>SMAD3</i> | 15:67482775 (T)  | 15: 67482775 | C/T     | 0.001818 | SNP | Synonymous P->P |       |                   |
| <i>SMAD3</i> | rs368655036      | 15: 67482925 | G/C     | 0.001818 | SNP | 3'UTR           |       |                   |
| <i>SMAD3</i> | rs534838557      | 15: 67483029 | C/T     | 0.001818 | SNP | 3'UTR           |       |                   |
| <i>SMAD3</i> | rs576939514      | 15: 67483089 | G/C     | 0.001818 | SNP | 3'UTR           |       |                   |
| <i>SMAD3</i> | 15:67483167 (-)  | 15: 67483167 | C/-     | 0.1145   | DEL | 3'UTR           |       |                   |
| <i>SMAD3</i> | 15:67483170-67   | 15: 67483171 | CCTC/CT | 0.02545  | DEL | 3'UTR           |       |                   |
| <i>SMAD3</i> | rs72661159       | 15: 67483175 | C/T     | 0.001818 | SNP | 3'UTR           |       |                   |
| <i>SMAD3</i> | 15:67483185 (-)  | 15: 67483185 | T/-     | 0.1418   | DEL | 3'UTR           |       |                   |
| <i>SMAD3</i> | 15:67483233 (A)  | 15: 67483233 | A/A/C   | 0.001818 | INS | 3'UTR           |       |                   |
| <i>SMAD3</i> | rs8025774        | 15: 67483276 | C/T     | 0.2618   | SNP | 3'UTR           |       |                   |
| <i>SMAD3</i> | 15:67483294 (-)  | 15: 67483294 | C/-     | 0.1255   | DEL | 3'UTR           |       |                   |
| <i>SMAD3</i> | 15:67483470 (-)  | 15: 67483470 | C/-     | 0.04     | DEL | 3'UTR           |       |                   |
| <i>SMAD3</i> | 15:67483581 (C)  | 15: 67483581 | T/C     | 0.001818 | SNP | 3'UTR           |       |                   |
| <i>SMAD3</i> | rs55970514       | 15: 67483717 | G/A     | 0.01455  | SNP | 3'UTR           |       |                   |
| <i>SMAD3</i> | rs8031440        | 15: 67483979 | G/A     | 0.2545   | SNP | 3'UTR           |       |                   |
| <i>SMAD3</i> | rs567052377      | 15: 67484039 | A/G     | 0.001818 | SNP | 3'UTR           |       |                   |
| <i>SMAD3</i> | rs72661160       | 15: 67484055 | C/T     | 0.005455 | SNP | 3'UTR           |       |                   |
| <i>SMAD3</i> | 15:67484081 (-)  | 15: 67484081 | G/-     | 0.1909   | DEL | 3'UTR           |       |                   |
| <i>SMAD3</i> | rs8031627        | 15: 67484119 | G/A     | 0.2527   | SNP | 3'UTR           |       |                   |
| <i>SMAD3</i> | 15:67484290 (C)  | 15: 67484290 | G/C     | 0.001818 | SNP | 3'UTR           |       |                   |
| <i>SMAD3</i> | rs2278670        | 15: 67484297 | C/T     | 0.2564   | SNP | 3'UTR           |       |                   |
| <i>SMAD3</i> | rs144205938      | 15: 67484754 | C/T     | 0.007273 | SNP | 3'UTR           |       |                   |
| <i>SMAD3</i> | rs549152312      | 15: 67484902 | T/C     | 0.003636 | SNP | 3'UTR           |       |                   |
| <i>SMAD3</i> | rs11638476       | 15: 67485101 | G/A     | 0.3673   | SNP | 3'UTR           |       |                   |
| <i>SMAD3</i> | 15:67485102 (A)  | 15: 67485102 | G/A     | 0.02364  | SNP | 3'UTR           |       |                   |
| <i>SMAD3</i> | rs188412401      | 15: 67485103 | A/G     | 0.009091 | SNP | 3'UTR           |       |                   |
| <i>SMAD3</i> | rs573436525      | 15: 67485103 | A/-     | 0.16     | DEL | 3'UTR           |       |                   |
| <i>SMAD3</i> | rs12595334       | 15: 67485156 | C/T     | 0.2618   | SNP | 3'UTR           |       |                   |
| <i>SMAD3</i> | rs755985886      | 15: 67485277 | C/T     | 0.001818 | SNP | 3'UTR           |       |                   |
| <i>SMAD3</i> | rs72661161       | 15: 67485421 | C/T     | 0.005455 | SNP | 3'UTR           |       |                   |
| <i>SMAD3</i> | 15:67485565 (C)  | 15: 67485565 | A/C     | 0.001818 | SNP | 3'UTR           |       |                   |
| <i>SMAD3</i> | rs3743342        | 15: 67485667 | C/T     | 0.2527   | SNP | 3'UTR           |       |                   |
| <i>SMAD3</i> | rs145645018      | 15: 67485911 | C/G     | 0.003636 | SNP | 3'UTR           |       |                   |

|              |                 |                      |             |          |     |                 |
|--------------|-----------------|----------------------|-------------|----------|-----|-----------------|
| <i>SMAD3</i> | 15:67485918 (-) | 15:67485918          | T/-         | 0.08     | DEL | 3'UTR           |
| <i>SMAD3</i> | rs3833027       | 15:67485934          | AGAG/A      | 0.001818 | DEL | 3'UTR           |
| <i>SMAD3</i> | rs62014610      | 15:67486000          | C/T         | 0.001818 | SNP | 3'UTR           |
| <i>SMAD3</i> | 15:67486010 (A) | 15:67486010          | G/A         | 0.003636 | SNP | 3'UTR           |
| <i>SMAD3</i> | rs747191952     | 15:67486032          | A/A/T       | 0.1382   | INS | 3'UTR           |
| <i>SMAD3</i> | rs878890006     | 15:67486033          | T/-         | 0.3873   | DEL | 3'UTR           |
| <i>SMAD3</i> | rs11556089      | 15:67486078          | G/A         | 0.08727  | SNP | 3'UTR           |
| <i>SMAD3</i> | rs11556090      | 15:67486383          | G/A         | 0.4836   | SNP | 3'UTR           |
| <i>SMAD3</i> | rs12900401      | 15:67486590          | C/T         | 0.04364  | SNP | 3'UTR           |
| <i>SMAD3</i> | rs3743343       | 15:67486775          | T/C         | 0.2655   | SNP | 3'UTR           |
| <i>SMAD3</i> | rs975954141     | 15:67486835          | A/A/T       | 0.1164   | INS | 3'UTR           |
| <i>SMAD3</i> | 15:67486836 (-) | 15:67486836          | T/-         | 0.1073   | DEL | 3'UTR           |
| <i>SMAD3</i> | rs1052488       | 15:67486847          | T/C         | 0.2527   | SNP | 3'UTR           |
| <i>SMAD3</i> | 15:67486933 (A) | 15:67486933          | A/A/T       | 0.001818 | INS | 3'UTR           |
| <i>SMAD3</i> | 15:67486934 (-) | 15:67486934          | T/-         | 0.02182  | DEL | 3'UTR           |
| <i>SMAD3</i> | rs72661162      | 15:67487275          | T/C         | 0.01091  | SNP | 3'UTR           |
| <i>SMAD3</i> | rs757151117     | 15:67487324          | C/G         | 0.003636 | SNP | 3'UTR           |
| <i>SMAD3</i> | rs10438355      | 15:67487549          | C/G         | 0.2691   | SNP | downstream      |
| <i>SMAD2</i> | 18:45456728 (T) | 18:45456728          | C/T         | 0.007273 | SNP | Intron          |
| <i>SMAD2</i> | 18:45456727 (T) | 18:45456727          | C/T         | 0.3618   | SNP | Intron          |
| <i>SMAD2</i> | 18:45456724-4!  | 18:45456724-45456726 | GCT/GGC     | 0.3618   | MNP | Intron          |
| <i>SMAD2</i> | rs552945104 (T) | 18:45395741          | C/T         | 0.001818 | SNP | Synonymous L->L |
| <i>SMAD2</i> | 18:45395624 (T) | 18:45395624          | A/T         | 0.2436   | SNP | Synonymous V->V |
| <i>SMAD2</i> | 18:45391525 (G) | 18:45391525          | T/G         | 0.001818 | SNP | Intron          |
| <i>SMAD2</i> | 18:45391509 (C) | 18:45391509          | C/C/A       | 0.005455 | INS | Intron          |
| <i>SMAD2</i> | rs149135973     | 18:45391419          | T/T/T       | 0.1491   | INS | Intron          |
| <i>SMAD2</i> | rs1177379668    | 18:45391390          | T/C         | 0.001818 | SNP | Intron          |
| <i>SMAD2</i> | rs72661147      | 18:45391356          | T/C         | 0.003636 | SNP | Intron          |
| <i>SMAD2</i> | 18:45377561 (-) | 18:45377561          | A/-         | 0.04364  | DEL | Intron          |
| <i>SMAD2</i> | 18:45371864 (T) | 18:45371864          | T/T/A       | 0.009091 | INS | Intron          |
| <i>SMAD2</i> | rs72661148      | 18:45371695          | A/G         | 0.04727  | SNP | Intron          |
| <i>SMAD2</i> | 18:45371573 (-) | 18:45371573          | C/-         | 0.003636 | DEL | 3'UTR           |
| <i>SMAD2</i> | rs866244434     | 18:45368107          | G/A         | 0.003636 | SNP | 3'UTR           |
| <i>SMAD2</i> | rs575364955     | 18:45367938          | T/G         | 0.001818 | SNP | 3'UTR           |
| <i>SMAD2</i> | rs192433123     | 18:45367802          | A/C         | 0.001818 | SNP | 3'UTR           |
| <i>SMAD2</i> | 18:45367652 (G) | 18:45367652          | G/G/A       | 0.01636  | INS | 3'UTR           |
| <i>SMAD2</i> | 18:45367562 (T) | 18:45367562          | T/T/A       | 0.001818 | INS | 3'UTR           |
| <i>SMAD2</i> | rs1001667150    | 18:45367537          | A/C         | 0.001818 | SNP | 3'UTR           |
| <i>SMAD2</i> | 18:45367529 (C) | 18:45367529          | A/C         | 0.009091 | SNP | 3'UTR           |
| <i>SMAD2</i> | rs200393944     | 18:45367528          | C/A         | 0.03455  | SNP | 3'UTR           |
| <i>SMAD2</i> | rs201278324     | 18:45367521          | AAAAAAAAC/- | 0.06545  | DEL | 3'UTR           |
| <i>SMAD2</i> | rs1158092324    | 18:45367517          | A/-         | 0.08364  | DEL | 3'UTR           |
| <i>SMAD2</i> | rs1170854585    | 18:45367505          | G/T         | 0.001818 | SNP | 3'UTR           |
| <i>SMAD2</i> | rs189397494     | 18:45367380          | C/T         | 0.001818 | SNP | 3'UTR           |
| <i>SMAD2</i> | 18:45367360 (C) | 18:45367360          | T/C         | 0.001818 | SNP | 3'UTR           |
| <i>SMAD2</i> | rs527529143     | 18:45367179          | A/C         | 0.001818 | SNP | 3'UTR           |
| <i>SMAD2</i> | rs1241300860    | 18:45367134          | T/C         | 0.001818 | SNP | 3'UTR           |
| <i>SMAD2</i> | 18:45367103 (C) | 18:45367103          | T/C         | 0.001818 | SNP | 3'UTR           |
| <i>SMAD2</i> | 18:45366897 (T) | 18:45366897          | C/T         | 0.003636 | SNP | 3'UTR           |
| <i>SMAD2</i> | 18:45366500 (T) | 18:45366500          | C/T         | 0.001818 | SNP | 3'UTR           |
| <i>SMAD2</i> | 18:45366465 (T) | 18:45366465          | T/T/A       | 0.05636  | INS | 3'UTR           |
| <i>SMAD2</i> | rs12954768      | 18:45366422          | T/G         | 0.005455 | SNP | 3'UTR           |
| <i>SMAD2</i> | rs72661150      | 18:45366210          | C/T         | 0.005455 | SNP | 3'UTR           |
| <i>SMAD2</i> | rs72661151      | 18:45366140          | C/T         | 0.01455  | SNP | 3'UTR           |
| <i>SMAD2</i> | 18:45366132 (A) | 18:45366132          | G/A         | 0.001818 | SNP | 3'UTR           |

|              |                 |              |        |          |     |       |
|--------------|-----------------|--------------|--------|----------|-----|-------|
| <i>SMAD2</i> | rs72661152      | 18: 45366084 | T/C    | 0.005455 | SNP | 3'UTR |
| <i>SMAD2</i> | rs560729239     | 18: 45365711 | T/C    | 0.003636 | SNP | 3'UTR |
| <i>SMAD2</i> | rs149229274     | 18: 45365688 | G/C    | 0.005455 | SNP | 3'UTR |
| <i>SMAD2</i> | 18:45365683 (C  | 18: 45365683 | T/C    | 0.001818 | SNP | 3'UTR |
| <i>SMAD2</i> | rs5824709       | 18: 45365397 | A/-    | 0.3285   | DEL | 3'UTR |
| <i>SMAD2</i> | rs1251386714    | 18: 45365396 | C/C/A  | 0.2318   | INS | 3'UTR |
| <i>SMAD2</i> | 18:45365378 (T) | 18: 45365378 | T/T/G  | 0.005455 | INS | 3'UTR |
| <i>SMAD2</i> | rs112132589     | 18: 45365336 | G/A    | 0.009091 | SNP | 3'UTR |
| <i>SMAD2</i> | 18:45365330 (C  | 18: 45365330 | C/C/A  | 0.01091  | INS | 3'UTR |
| <i>SMAD2</i> | 18:45365319 (C) | 18: 45365319 | C/C/A  | 0.01091  | INS | 3'UTR |
| <i>SMAD2</i> | rs1011483314    | 18: 45365066 | A/T    | 0.001818 | SNP | 3'UTR |
| <i>SMAD2</i> | rs928231569     | 18: 45365017 | C/T    | 0.001818 | SNP | 3'UTR |
| <i>SMAD2</i> | rs139145682     | 18: 45365014 | A/G    | 0.001818 | SNP | 3'UTR |
| <i>SMAD2</i> | rs1478104599    | 18: 45364720 | CTT/-  | 0.001818 | DEL | 3'UTR |
| <i>SMAD2</i> | rs1450957374    | 18: 45364543 | C/C/A  | 0.04364  | INS | 3'UTR |
| <i>SMAD2</i> | rs375946894     | 18: 45364489 | TGTT/- | 0.007273 | DEL | 3'UTR |
| <i>SMAD2</i> | rs17813836      | 18: 45364276 | T/C    | 0.009091 | SNP | 3'UTR |
| <i>SMAD2</i> | rs142213588     | 18: 45364208 | G/A    | 0.01818  | SNP | 3'UTR |
| <i>SMAD2</i> | rs183642985     | 18: 45364038 | G/A    | 0.007273 | SNP | 3'UTR |
| <i>SMAD2</i> | rs117487905     | 18: 45363411 | T/C    | 0.001818 | SNP | 3'UTR |
| <i>SMAD2</i> | rs8085335       | 18: 45363289 | A/G    | 0.05818  | SNP | 3'UTR |
| <i>SMAD2</i> | rs1792666       | 18: 45363214 | A/T    | 0.4982   | SNP | 3'UTR |
| <i>SMAD2</i> | rs146897233     | 18: 45363117 | T/T/A  | 0.05091  | INS | 3'UTR |
| <i>SMAD2</i> | 18:45362911 (G) | 18: 45362911 | G/G/T  | 0.003636 | INS | 3'UTR |
| <i>SMAD2</i> | rs16958509      | 18: 45362796 | T/C    | 0.005455 | SNP | 3'UTR |
| <i>SMAD2</i> | 18:45362790 (-) | 18: 45362790 | A/-    | 0.04909  | DEL | 3'UTR |
| <i>SMAD2</i> | rs8098413       | 18: 45362721 | C/T    | 0.06545  | SNP | 3'UTR |
| <i>SMAD2</i> | rs147470332     | 18: 45362509 | T/C    | 0.009091 | SNP | 3'UTR |
| <i>SMAD2</i> | rs1019023922    | 18: 45362459 | G/A    | 0.001818 | SNP | 3'UTR |
| <i>SMAD2</i> | 18:45362372 (G  | 18: 45362372 | A/G    | 0.001818 | SNP | 3'UTR |
| <i>SMAD2</i> | rs1050448319    | 18: 45362279 | T/T/T  | 0.005455 | INS | 3'UTR |
| <i>SMAD2</i> | rs547209827     | 18: 45362245 | C/T    | 0.001818 | SNP | 3'UTR |
| <i>SMAD2</i> | rs1792671       | 18: 45362194 | C/T    | 0.4464   | SNP | 3'UTR |
| <i>SMAD2</i> | rs180935952     | 18: 45362160 | C/A    | 0.001818 | SNP | 3'UTR |
| <i>SMAD2</i> | 18:45362136 (C  | 18: 45362136 | C/C/T  | 0.001818 | INS | 3'UTR |
| <i>SMAD2</i> | 18:45361809 (-) | 18: 45361809 | T/-    | 0.1764   | DEL | 3'UTR |
| <i>SMAD2</i> | rs182383364     | 18: 45361643 | A/T    | 0.003636 | SNP | 3'UTR |
| <i>SMAD2</i> | rs1362163540    | 18: 45361642 | T/A    | 0.01091  | SNP | 3'UTR |
| <i>SMAD2</i> | 18:45361523 (T/ | 18: 45361523 | T/T/A  | 0.02364  | INS | 3'UTR |
| <i>SMAD2</i> | rs116123302     | 18: 45361493 | G/C    | 0.001818 | SNP | 3'UTR |
| <i>SMAD2</i> | 18:45361489 (T/ | 18: 45361489 | T/T/A  | 0.02364  | INS | 3'UTR |
| <i>SMAD2</i> | 18:45361464 (G  | 18: 45361464 | G/G/T  | 0.01091  | INS | 3'UTR |
| <i>SMAD2</i> | rs145901048     | 18: 45361363 | G/A    | 0.001818 | SNP | 3'UTR |
| <i>SMAD2</i> | rs72912348      | 18: 45361245 | T/C    | 0.007273 | SNP | 3'UTR |
| <i>SMAD2</i> | rs1981          | 18: 45360991 | G/A    | 0.4418   | SNP | 3'UTR |
| <i>SMAD2</i> | rs562651074     | 18: 45360860 | G/C    | 0.001818 | SNP | 3'UTR |
| <i>SMAD2</i> | rs776570464     | 18: 45360801 | A/G    | 0.001818 | SNP | 3'UTR |
| <i>SMAD2</i> | rs115139672     | 18: 45360184 | G/C    | 0.001818 | SNP | 3'UTR |
| <i>SMAD2</i> | rs1435018887    | 18: 45359955 | A/-    | 0.1127   | DEL | 3'UTR |
| <i>SMAD2</i> | rs79514034      | 18: 45359803 | C/T    | 0.007273 | SNP | 3'UTR |
| <i>SMAD2</i> | rs8671          | 18: 45359664 | A/T    | 0.4909   | SNP | 3'UTR |
| <i>SMAD2</i> | rs763168619     | 18: 45359618 | C/T    | 0.001818 | SNP | 3'UTR |
| <i>SMAD2</i> | rs557633152     | 18: 45359568 | A/G    | 0.003636 | SNP | 3'UTR |



|              |                 |              |       |          |     |               |       |  |                   |
|--------------|-----------------|--------------|-------|----------|-----|---------------|-------|--|-------------------|
| <i>TGFB1</i> | 19:41859051(AC) | 19: 41859051 | A/AG  | 0.01091  | INS | 5'UTR         |       |  |                   |
| <i>TGFB1</i> | 19:41859003(TC) | 19: 41859003 | T/TG  | 0.1255   | INS | 5'UTR         |       |  |                   |
| <i>TGFB1</i> | rs1349110564    | 19: 41858963 | C/-   | 0.03091  | DEL | 5'UTR         |       |  |                   |
| <i>TGFB1</i> | rs749452831     | 19: 41858962 | G/GC  | 0.005455 | INS | 5'UTR         |       |  |                   |
| <i>TGFB1</i> | rs759113717     | 19: 41858937 | C/T   | 0.001818 | SNP | Missense G->R | G5R   |  | benign            |
| <i>TGFB1</i> | rs1800470       | 19: 41858921 | A/G   | 0.4036   | SNP | Missense P->L | L10P  |  | benign            |
| <i>TGFB1</i> | rs1800471       | 19: 41858876 | C/G   | 0.06364  | SNP | Missense R->P | R25P  |  | benign            |
| <i>TGFB1</i> | 19:41858873(C)  | 19: 41858873 | G/C   | 0.01273  | SNP | Missense P->R | P26R  |  | benign            |
| <i>TGFB1</i> | rs199758510     | 19: 41858864 | C/A   | 0.001818 | SNP | Missense G->V | G29V  |  | possibly damaging |
| <i>TGFB1</i> | 19:41858762(C)  | 19: 41858762 | C/CG  | 0.007273 | INS | Frameshift    |       |  |                   |
| <i>TGFB1</i> | rs200230522     | 19: 41858739 | C/T   | 0.001818 | SNP | Missense G->S | G71S  |  | benign            |
| <i>TGFB1</i> | 19:41858728(C)  | 19: 41858728 | C/CG  | 0.001818 | INS | Frameshift    |       |  |                   |
| <i>TGFB1</i> | 19:41850658(-)  | 19: 41850658 | G/-   | 0.01455  | DEL | Frameshift    |       |  |                   |
| <i>TGFB1</i> | 19:41848140(-)  | 19: 41848140 | C/-   | 0.01091  | DEL | Frameshift    |       |  |                   |
| <i>TGFB1</i> | rs55659002      | 19: 41847943 | G/-   | 0.007273 | DEL | intron        |       |  |                   |
| <i>TGFB1</i> | rs1800472       | 19: 41847860 | G/A   | 0.03818  | SNP | Missense T->I | T263I |  | benign            |
| <i>TGFB1</i> | rs188080621     | 19: 41847770 | C/G   | 0.001818 | SNP | Intron        |       |  |                   |
| <i>TGFB1</i> | rs11466334      | 19: 41847737 | G/A   | 0.001818 | SNP | Intron        |       |  |                   |
| <i>TGFB1</i> | rs8179181       | 19: 41838206 | G/A   | 0.2527   | SNP | Intron        |       |  |                   |
| <i>TGFB1</i> | rs200550755     | 19: 41838016 | C/T   | 0.001818 | SNP | Intron        |       |  |                   |
| <i>TGFB1</i> | rs756877212     | 19: 41836225 | T/C   | 0.001818 | SNP | downstream    |       |  |                   |
| <i>TGFB1</i> | rs1030488680    | 19: 41835164 | C/T   | 0.001818 | SNP | downstream    |       |  |                   |
| <i>TGFB1</i> | rs117064611     | 19: 41834818 | G/A   | 0.02364  | SNP | downstream    |       |  |                   |
| <i>TGFB1</i> | rs143386142     | 19: 41834559 | C/T   | 0.001818 | SNP | downstream    |       |  |                   |
| <i>TGFB1</i> | rs1017131395    | 19: 41834503 | C/G   | 0.001818 | SNP | downstream    |       |  |                   |
| <i>TGFB1</i> | rs12983047      | 19: 41834499 | A/G   | 0.1564   | SNP | downstream    |       |  |                   |
| <i>TGFB1</i> | rs904198258     | 19: 41834248 | C/T   | 0.001818 | SNP | downstream    |       |  |                   |
| <i>TGFB1</i> | rs545612006     | 19: 41834243 | G/A   | 0.005455 | SNP | downstream    |       |  |                   |
| <i>TGFB1</i> | rs73045282      | 19: 41833233 | G/A   | 0.05636  | SNP | downstream    |       |  |                   |
| <i>TGFB1</i> | rs201781533     | 19: 41833192 | G/GCA | 0.003636 | INS | downstream    |       |  |                   |
| <i>TGFB1</i> | rs10417924      | 19: 41833167 | C/T   | 0.2255   | SNP | downstream    |       |  |                   |
| <i>TGFB1</i> | rs142023663     | 19: 41833151 | G/A   | 0.001818 | SNP | downstream    |       |  |                   |
